# Supplementary material
Source: PubMed Central journal article supplement (PMC6635908)

## Supplementary Online Content

Jahan R, Saver JL, Schwamm LH, et al. Association between time to treatment with endovascular reperfusion therapy and outcomes in patients with acute ischemic stroke treated in clinical practice. *JAMA*. doi:10.1001/jama.2019.8286

### Supplement – Table of Contents

| Title                                                                                                                                                                                                                                                             | Page   |
|-------------------------------------------------------------------------------------------------------------------------------------------------------------------------------------------------------------------------------------------------------------------|--------|
| eMethods 1                                                                                                                                                                                                                                                        | 3      |
| eMethods 2                                                                                                                                                                                                                                                        | 4      |
| eResults 1                                                                                                                                                                                                                                                        | 5      |
| eResults 2                                                                                                                                                                                                                                                        | 6      |
| eResults 3                                                                                                                                                                                                                                                        | 7      |
| eTable 1. Patient baseline characteristics and outcomes analyzed from the comprehensive stroke center module of the GWTG-Stroke program                                                                                                                           | 8      |
| eTable 2. Baseline patient and hospital characteristics adjusted in the multivariable models                                                                                                                                                                      | 9      |
| eTable 3. Patient- and hospital-level characteristics for included patients compared with patients excluded for missing documentation of 1 or more key baseline covariates                                                                                        | 10, 11 |
| eTable 4. Patient- and hospital-level characteristics for patients with witnessed versus unwitnessed stroke onset                                                                                                                                                 | 12, 13 |
| eTable 5. Patient- and hospital-level characteristics of EMS-arriving patients treated with endovascular reperfusion therapy, overall and in different door to puncture time windows                                                                              | 14, 15 |
| eTable 6. Additional effectiveness outcomes of patients treated with endovascular reperfusion therapy, overall, and in different onset to puncture time windows                                                                                                   | 16     |
| eTable 7. Clinical and adverse event outcomes of EMS-arriving patients treated with endovascular reperfusion therapy, overall and in different door to puncture time intervals                                                                                    | 17     |
| eTable 8. Additional clinical outcomes of EMS-arriving patients treated with endovascular reperfusion therapy, overall and in different door to puncture time intervals                                                                                           | 18     |
| eTable 9A. Comparison of time-benefit relationships in all patients in the 30-270 minute onset-to-puncture time window versus the 271-480 minute onset-to-puncture window, in relation to onset-to-puncture time as a continuous curve, adjusted analysis.        | 19     |
| eTable 9B. Absolute change in clinical and adverse event outcomes of all patients treated with endovascular reperfusion therapy in relation to onset-to-puncture time as a continuous curve, adjusted analysis, in the 30-270 minute onset-to-puncture window.    | 20     |
| eTable 10. Comparison of time-benefit relationships in the 30-270 minute onset-to-puncture time window in witnessed versus unwitnessed onset patients, in relation to onset-to-puncture time as a continuous curve, adjusted analysis.                            | 21     |
| eTable 11A. Comparison of time-benefit relationships in EMS-arriving patients in the 30-120 minute door-to-puncture time window versus the 121-180 minute onset-to-puncture window, in relation to door-to-puncture time as a continuous curve, adjusted analysis | 22     |

|                                                                                                                                                                                                                                                                                                                           |        |
|---------------------------------------------------------------------------------------------------------------------------------------------------------------------------------------------------------------------------------------------------------------------------------------------------------------------------|--------|
| <b>eTable 11B. Clinical and adverse event outcomes of EMS-arriving patients treated with endovascular reperfusion therapy in relation to door-to-puncture as a continuous curve, in adjusted analysis, in the 30-120 minute window.</b>                                                                                   | 23     |
| <b>eFigure 1. Distribution of time intervals in endovascular reperfusion therapy patients. A) Onset (last known well) to arterial puncture times, in all patients, patients with witnessed onset, and patients with unwitnessed onset; B) Door (ED arrival time) to arterial puncture times in EMS arriving patients.</b> | 24     |
| <b>eFigure 2. Onset to Door Times (OTD) among patients with witnessed stroke onset, and unwitnessed stroke onset.</b>                                                                                                                                                                                                     | 25     |
| <b>eFigure 3. Door to puncture times among patients arriving directly via EMS and patients arriving by interfacility transfer to the endovascular reperfusion therapy hospital.</b>                                                                                                                                       | 26     |
| <b>eFigure 4. Changes in main clinical and adverse event outcomes with continuous variation in onset-to-puncture time, unadjusted analysis.</b>                                                                                                                                                                           | 27     |
| <b>eFigure 5. Changes in additional clinical and adverse event outcomes with continuous variation in onset-to-puncture time, adjusted analysis.</b>                                                                                                                                                                       | 28     |
| <b>eFigure 6. Changes in main clinical and adverse event outcomes with continuous variation in onset-to-puncture time, in witnessed and unwitnessed onset patients, adjusted analysis.</b>                                                                                                                                | 29, 30 |
| <b>eFigure 7. Time benefit curves for changes in clinical and adverse event outcomes with continuous variation in door-to-puncture time, unadjusted analysis.</b>                                                                                                                                                         | 31     |
| <b>eFigure 8. Time benefit curves for changes in clinical and adverse event outcomes with continuous variation in door-to-puncture time, adjusted analysis.</b>                                                                                                                                                           | 32     |

## **eMethods 1**

The two time intervals evaluated for relation to outcomes were onset (last known well) to arterial puncture and hospital arrival to arterial puncture (door to puncture).

Onset to puncture time was analyzed in all patients and separately in patients with and without witnessed symptom onset, both as a continuous variable and as a categorical variable with equal spaced timed periods of 30-120 minutes, 121-240 minutes, 241-360 minutes, and 361-480 minutes.

Door to puncture time was analyzed in patients who arrived directly by emergency medical services transport from the field to the emergency department of the treating hospital. Interfacility transfer patients were not included in the main door to puncture time-benefit analysis, as times for their first presentation at the outside facility were not recorded in the dataset. In addition, for several reasons, the door to puncture times of interfacility transfer and direct-arriving patients are not assimilable. First, interfacility transfer patients typically have brief door to puncture times at the endovascular treatment facility, due to having already completed some diagnostic and management processes at the first hospital and due to pre-transfer notification enabling team and equipment readiness at the endovascular treatment hospital. Concomitantly, interfacility transfer patients have distinctively long onset to puncture time, due to the time required for transfer. Door to puncture times were analyzed both as a continuous variable and as a categorical variable with equal spaced timed periods of 31-60, 61-90, 91-120, 121-150, and 151-180 minutes.

## eMethods 2

As noted, generalized estimating equations were used in all regression models to account for within-hospital clustering. Patients treated at a given hospital share some commonalities that differ from patients treated at a different hospital, related to their physical environment, local sociocultural practices, hospital resources and care policies, and other location-related factors. Therefore, to account for such commonalities, models were adjusted for both patient-level and hospital-level characteristics. Since the outcomes of patients may be also affected by these commonalities (similarities in outcomes among patients within the same hospital), generalized estimating equations (GEE) technique were used in the regression models to account for such a clustering of patients within a hospital, while adjusting for both patient-level and hospital-level characteristics. The multivariable models adjusted for 28 patient-level and 9 hospital-level characteristics (listed in eTable 2) simultaneously, and non-significant variables were included. The logistic regression model assumes that independent variables have a linear relationship with respect to the prevalence of the dependent variable (i.e., the outcome) on the logit scale. All the continuous variables included for adjustment were evaluated for non-linearity with the outcome, and linear splines were used for those that violated the linearity assumption. By using restricted cubic splines for OTP and DTP, any non-linearity between these measures and the outcome of interest is accounted for in the regression model.

From the initial linear section of the time-benefit curves, before the occurrence of the first deviation from linearity and spline placement, increased number of beneficial outcomes among 1000 treated patients associated with a 15 minute faster speed of onset to puncture and of door to puncture was calculated. These benefit per thousand (BPT, also known as natural frequency) values were derived from the slope of the initial linear segment of the time-benefit graph. First the risk difference (RD) per 15 minutes was calculated by multiplying the slope, expressed in units of outcomes per minute, by 15 minutes. From the risk difference, the BPT was calculated as:  $BPT = RD \times 1000$ .

Analyses of discharge and 3 month modified Rankin Scale (mRS) outcomes were conducted in complete case sample and inverse probability weighting (IPW) method was employed. The analyses were conducted in two steps. First, the propensity, defined as the probability that a patient had complete data on mRS, was calculated using a logistic regression model (propensity model). Then, the multivariable model of outcomes (IPW model) were conducted in the outcome complete cases and used the inverse of the propensity as weight to increase the weighting of patients with a high estimated propensity of outcome being missing, and to decrease the weighting of patients with a low estimated propensity of outcome being missing, so as to compensate for patients who were actually missing the outcome measure. The propensity model for discharge mRS included the baseline covariates used in the multivariable models for other outcomes and also the discharge destination and discharge ambulatory status. The propensity model for 90 day mRS included the baseline covariates and also discharge destination, discharge ambulatory status, and discharge mRS. The IPW model adjusted for the baseline covariates used in the multivariable models for other outcomes in addition to the weighting.

## eResults 1

For patient-level baseline variables, among analyzed patients, complete data were available for: age, sex, race-ethnicity, arrived off-hours, National Institutes of Health Stroke Scale (NIHSS), intravenous (IV) recombinant tissue plasminogen (rtPA) use, and arterial site of occlusion. Rates of missingness were low to moderate for: past medical history 0.03%, arrival mode 0.2%, insurance status 2.7%, medications at time of index stroke - anticoagulant/antiplatelet 0.2%, cholesterol reducer 0.04%, antihypertensive 9.4%, diabetes medications 11.6%. For these missing patient-level baseline variables, missing values were imputed to the mode or median. One patient-level baseline variable had a high rate of missingness: ambulatory status prior to admission, missing in 22%. Among patients with this variable documented, the preponderance, 95%, were able to ambulate independently. Because of the high rate of missingness, this variable was not included in multivariable models.

For hospital-level variables, complete data were available for: annual ischemic stroke volume, annual IV rtPA volume, annual endovascular reperfusion therapy volume, Joint Commission stroke center certification, and geographic region. Rates of missingness for other hospital-level variables were: number of beds 2.2%, and teaching hospital status 1.8%. For these hospital-level variables with any missingness, the variables were not included in multivariable models.

For outcome variables, complete data were available for mortality. Rates of missingness were low to moderate for discharge destination 0.3%, sICH 0.9%, substantial reperfusion 6.4%, and ambulatory status at discharge 14.4%. Rates of missingness were higher for discharge mRS 21.1%, and substantial for 3 month mRS 44.1%. For 3 month mRS, across centers, the distribution of missingness was median 43% (IQR 21%,78%).

## eResults 2

The Types of mechanical interventions employed were stent retrievers in 64.2% of patients, clot suction devices in 36.1%, other retriever devices in 9.1%, other mechanical techniques in 4.1%, intracranial angioplasty (with or without permanent stenting) in 2.8%, intraarterial fibrinolysis in 9.9%, and cervical carotid angioplasty (with or without permanent stenting) in 2.5%. The most common combination approach was serial or simultaneous use of stent retrievers and suction devices in 17.1% of patients. The most common solo technique approaches were stent retrievers in 37.3% of patients, suction devices in 12.4%, and other mechanical clot retriever device (not retrievable stent) in 5.6%. A single type of endovascular reperfusion therapy was used in 59.3% of patients, multiple types in 32.8%, with 7.9% unspecified.

### eResults 3

Symptom onset was witnessed (last known well time same as symptom discovery time) in 67.7% of patients and unwitnessed (last known well time earlier than symptom discovery time) in 32.3%, and onset to puncture time times were shorter in witnessed than unwitnessed onset patients, median 216 minutes (IQR 161-286) vs 262 minutes (IQR 200-340),  $p < 0.001$ . Patients with witnessed onset were younger, had mildly less severe presenting deficits and mildly lower initial serum glucose levels, were more likely to have received IV rtPA, and were more likely to arrive by interfacility transfer. Hospital-level characteristics associated with witnessed onset included: fewer annual endovascular reperfusion therapy cases, fewer annual IV rtPA cases, lack of Comprehensive Stroke Center certification, and location in the South (eTable 4, Supplement). Onset (last known well) to door times markedly differed between witnessed versus unwitnessed patients, 125 (IQR 54-201) versus 173 (IQR 92-255) minutes,  $p < 0.001$ , with a pronounced early 30-90 minute peak with witnessed onset but a wide 30-300 minute plateau with unwitnessed onset (eFigure 2, Supplement).

**eTable 1. Patient baseline characteristics and outcomes analyzed from the comprehensive stroke center module of the GWTG-Stroke program.**

| <b>Patient Characteristics</b>                                                                     |  |
|----------------------------------------------------------------------------------------------------|--|
| Demographics                                                                                       |  |
| Medical history                                                                                    |  |
| Last known well time                                                                               |  |
| Mode and time of hospital arrival                                                                  |  |
| In-hospital diagnostic studies                                                                     |  |
| NIHSS                                                                                              |  |
| Recombinant tissue plasminogen activator treatment initiation time                                 |  |
| Arterial site of large vessel occlusion                                                            |  |
| Arterial puncture time                                                                             |  |
| Other treatments and procedures                                                                    |  |
| Discharge treatments and counseling                                                                |  |
| <b>Outcomes - Main</b>                                                                             |  |
| Technical endpoint                                                                                 |  |
| Substantial reperfusion, defined as mTICI score 2b-3 (50-100% reperfusion)                         |  |
| Functional endpoints assessed at discharge                                                         |  |
| Discharge to home (versus acute rehabilitation, skilled nursing facility, hospice, death, other)   |  |
| Ambulatory without assistance                                                                      |  |
| Freedom from disability (mRS, 0-1)                                                                 |  |
| Functional independence (mRS 0-2)                                                                  |  |
| Adverse event outcomes                                                                             |  |
| In-hospital mortality/discharge to hospice                                                         |  |
| sICH within 36 hours                                                                               |  |
| <b>Outcomes - Other</b>                                                                            |  |
| Functional endpoints assessed at discharge                                                         |  |
| Discharge to home or acute rehabilitation (versus skilled nursing facility, hospice, death, other) |  |
| Ambulatory with or without assistance                                                              |  |
| Functional endpoints assessed at 3 months                                                          |  |
| Freedom from disability (mRS 0-1)                                                                  |  |
| Functional independence (mRS 0-2)                                                                  |  |
| Adverse event outcomes                                                                             |  |
| In-hospital mortality                                                                              |  |

GWTG-Stroke, Get with the Guidelines-Stroke; NIHSS, National Institute of Health Stroke Scale; mTICI, modified Thrombolysis in Cerebral Ischemia; mRS, modified Rankin Scale; sICH, symptomatic intracranial hemorrhage



**eTable 2. Baseline patient and hospital characteristics adjusted in the multivariable models.**

| <b>Patient Characteristics</b>                                                                |  |
|-----------------------------------------------------------------------------------------------|--|
| Demographics                                                                                  |  |
| Age                                                                                           |  |
| Female sex                                                                                    |  |
| Race (Black, Hispanic, Asian, other vs. Caucasian)                                            |  |
| Insurance (Medicare, Medicaid, other (including private insurance, VA), vs. no insurance)     |  |
| Medical History                                                                               |  |
| Atrial fibrillation/flutter                                                                   |  |
| Prosthetic Valve                                                                              |  |
| CAD/ Prior MI                                                                                 |  |
| Carotid Stenosis                                                                              |  |
| Diabetes                                                                                      |  |
| PVD                                                                                           |  |
| Hypertension                                                                                  |  |
| Smoking                                                                                       |  |
| Dyslipidemia                                                                                  |  |
| Prior Stroke / TIA                                                                            |  |
| Heart Failure                                                                                 |  |
| Renal Insufficiency                                                                           |  |
| Sleep Apnea                                                                                   |  |
| Depression                                                                                    |  |
| Arrival and Admission Information                                                             |  |
| EMS arrival vs transfer from another facility vs private transportation                       |  |
| Arrival off-hours                                                                             |  |
| NIHSS                                                                                         |  |
| Interaction of age and NIHSS                                                                  |  |
| Use of IV rtPA at this hospital or at the transferring hospital or prior to intraarterial use |  |
| Medications prior to admission                                                                |  |
| Antihypertensive                                                                              |  |
| Lipid lowering                                                                                |  |
| Antiplatelet and anticoagulation                                                              |  |
| Diabetic                                                                                      |  |
| Site of Occlusion                                                                             |  |
| ICA (cervical or intracranial) vs MCA (MCA, M1 MCA, M2 MCA)                                   |  |
| <b>Hospital characteristics</b>                                                               |  |
| Rural vs urban setting                                                                        |  |
| Number of beds                                                                                |  |
| Teaching hospital                                                                             |  |
| Regions                                                                                       |  |
| West                                                                                          |  |
| South                                                                                         |  |
| Midwest                                                                                       |  |
| Northeast                                                                                     |  |
| Certified PSC                                                                                 |  |
| Certified CSC                                                                                 |  |
| Annual number of AIS discharges                                                               |  |
| Annual IV rtPA volume                                                                         |  |
| Annual intraarterial therapy volume                                                           |  |

CAD, coronary artery disease; MI, myocardial infarction; PVD, peripheral vascular disease; TIA, transient ischemic attack; EMS, emergency medical services; NIHSS, National Institute of Health Stroke Scale; IV, intravenous; rtPA, recombinant tissue plasminogen activator; ICA, internal carotid artery; MCA, middle cerebral artery; PSC, primary stroke center; CSC, comprehensive stroke center; AIS, acute ischemic stroke

**eTable 3. Patient- and hospital-level characteristics for included patients compared with patients excluded for missing documentation of 1 or more key baseline covariates**

|                                                     | Excluded      | Included      | Standardized difference (%)* |
|-----------------------------------------------------|---------------|---------------|------------------------------|
| N                                                   | 288           | 6756          |                              |
| Age, mean (SD), years                               | 68.69 (14.8)  | 69.49 (14.8)  | 5.4                          |
| Female, sex (%)                                     | 119 (41.3)    | 3460 (51.2)   | 19.1                         |
| Race/ethnicity (%)                                  |               |               | 19.7                         |
| White, non-Hispanic                                 | 183 (63.5)    | 4667 (69.1)   |                              |
| Black                                               | 40 (13.9)     | 1049 (15.5)   |                              |
| Hispanic                                            | 25 (8.7)      | 433 (6.4)     |                              |
| Asian                                               | 10 (3.5)      | 178 (2.6)     |                              |
| Other                                               | 29 (10.1)     | 429 (6.4)     |                              |
| Arrival at off hours^ (%)                           | 145 (50.4)    | 3427 (50.7)   | 0.8                          |
| Arrival by EMS                                      | 114 (39.6)    | 3454 (51.1)   | 20.8                         |
| LKW to arrival, median (IQR), min                   | 150 (52-225)  | 141 (62-218)  | 22.6                         |
| Received IV rtPA (at ERT or outside hospital)       | 208 (72.2)    | 4610 (68.2)   | 8.7                          |
| Door to rtPA (at the ERT hospital), median (IQR), m | 42 (32-54)    | 41 (30-55)    | 113.1                        |
| NIHSS, median (IQR)                                 | 17 (12-22)    | 17 (12-22)    | 3.5                          |
| Ambulatory status prior to index stroke             | 37 (12.9)     | 495 (7.3)     | 25.9                         |
| Severe stroke, NIHSS >16 (%)                        | 130 (60.5)    | 4020 (59.5)   | 2.0                          |
| Medical History (%)                                 |               |               |                              |
| Atrial fibrillation/flutter                         | 95 (33.5)     | 2393 (35.4)   | 4.2                          |
| CAD/prior MI                                        | 67 (23.6)     | 1665 (24.7)   | 2.5                          |
| Carotid stenosis                                    | 3 (1.1)       | 186 (2.8)     | 12.4                         |
| Diabetes mellitus                                   | 73 (25.7)     | 1645 (24.4)   | 3.1                          |
| Dyslipidemia                                        | 111 (39.1)    | 2856 (42.3)   | 6.5                          |
| Hypertension                                        | 203 (71.5)    | 4850 (71.8)   | 0.7                          |
| Prosthetic heart valve                              | 9 (3.2)       | 144 (2.1)     | 6.5                          |
| Peripheral vascular disease                         | 15 (5.3)      | 251 (3.7)     | 7.6                          |
| Heart failure                                       | 40 (14.1)     | 944 (14.0)    | 0.3                          |
| Smoker                                              | 41 (14.4)     | 1224 (18.1)   | 10.0                         |
| Previous stroke/TIA                                 | 56 (19.7)     | 1517 (22.5)   | 6.7                          |
| Obesity                                             | 68 (23.9)     | 1652 (24.5)   | 1.2                          |
| Drug/alcohol abuse                                  | 16 (5.6)      | 465 (6.9)     | 5.2                          |
| Renal insufficiency                                 | 17 (6.0)      | 393 (5.8)     | 0.7                          |
| Sleep apnea                                         | 14 (4.9)      | 263 (3.9)     | 5.0                          |
| Depression                                          | 18 (6.3)      | 582 (8.6)     | 8.7                          |
| Medication before admission (%)                     |               |               |                              |
| Anticoagulants/ Antiplatelets                       | 145 (50.4)    | 3498 (51.8)   | 1.3                          |
| Antihypertensive                                    | 144 (50.0)    | 3952 (58.5)   | 16.1                         |
| Cholesterol reducer                                 | 113 (39.2)    | 2803 (41.5)   | 2.9                          |
| Antidiabetic                                        | 49 (17.0)     | 976 (14.5)    | 8.7                          |
| Hospital size, median no. of beds (IQR)             | 469 (349-635) | 572 (425-762) | 35.3                         |
| Hospital region (%)                                 |               |               | 76.4                         |
| West                                                | 127 (44.1)    | 843 (12.5)    |                              |
| South                                               | 77 (26.7)     | 2943 (43.6)   |                              |

|                                                           |                 |                 |                                     |
|-----------------------------------------------------------|-----------------|-----------------|-------------------------------------|
| Midwest                                                   | 44 (15.3)       | 1526 (22.6)     |                                     |
| Northeast                                                 | 40 (13.9)       | 1444 (21.4)     |                                     |
|                                                           | <b>Excluded</b> | <b>Included</b> | <b>Standardized difference (%)*</b> |
| Academic hospital (%)                                     | 251 (87.2)      | 5922 (87.7)     | 6.4                                 |
| Primary stroke center (%)                                 | 206 (71.5)      | 4714 (70.0)     | 3.9                                 |
| Comprehensive stroke center (%)                           | 114 (39.6)      | 3334 (49.4)     | 19.8                                |
| Urban location (versus rural location) (%)                | 288 (100)       | 6756 (100)      | 0.0                                 |
| Annual volume of ischemic stroke discharges, median (IQR) | 283(222-413)    | 407 (288-494)   | 58.6                                |
| Annual volume of rtPA administration, median (IQR)        | 31 (26-46)      | 36 (27-50)      | 21.0                                |
| Annual volume of ERT cases, median (IQR)                  | 36 (24-48)      | 41 (27-62)      | 28.3                                |

^Off hours are holiday or before 7AM and after 6PM on Monday-Friday

N, number; SD, standard deviation; EMS, Emergency Medical Service; IQR, interquartile range; LKW, last known well; rtPA, recombinant tissue plasminogen activator; NIHSS, National Institutes of Health Stroke Scale; CAD, coronary artery disease; MI, myocardial infarction; TIA, transient ischemic attack; ERT, endovascular reperfusion therapy

\*Calculated as the difference in means or proportions divided by a pooled estimate of the standard deviation. A standardized difference greater than 25 is typically considered meaningful and a standardized difference between >10 and ≤25 is considered potentially meaningful.

**eTable 4. Patient- and hospital-level characteristics for patients with witnessed versus unwitnessed stroke onset.**

|                                               | <b>Witnessed</b> | <b>Unwitnessed</b> | <b>p-value*</b> |
|-----------------------------------------------|------------------|--------------------|-----------------|
| N                                             | 4572             | 2184               |                 |
| Age, mean (SD), years                         | 69.2 (14.7)      | 70.1 (14.8)        | 0.008           |
| Female, sex (%)                               | 2358 (51.6)      | 1102 (50.5)        | 0.39            |
| Race/ethnicity (%)                            |                  |                    | 0.82            |
| White, non-Hispanic                           | 3166 (69.2)      | 1501 (68.7)        |                 |
| Black                                         | 704 (15.4)       | 345 (15.8)         |                 |
| Hispanic                                      | 298 (6.5)        | 135 (6.2)          |                 |
| Asian                                         | 114 (2.5)        | 64 (2.9)           |                 |
| Other                                         | 290 (6.3)        | 139 (6.4)          |                 |
| Arrival at off hours^                         | 2313 (50.6)      | 1114 (51.0)        | 0.75            |
| Arrival by EMS                                | 2279 (49.8)      | 1175 (53.8)        | 0.01            |
| LKW to arrival, median (IQR), min             | 125 (54-201)     | 173 (92-255)       | <0.001          |
| Received IV rtPA (at ERT or outside hospital) | 3240 (70.9)      | 1370 (62.7)        | <0.001          |
| Door to rtPA, median (IQR), min               | 41 (30-54)       | 41 (31-56)         | 0.12            |
| NIHSS, median (IQR)                           | 17 (12-22)       | 18 (13-22)         | 0.002           |
| Severe stroke, NIHSS > 16 (%)                 | 2660 (58.2)      | 1360 (62.3)        | 0.001           |
| Medical History (%)                           |                  |                    |                 |
| Atrial fibrillation/flutter                   | 1600 (35)        | 793 (36.3)         | 0.29            |
| CAD/prior MI                                  | 1118 (24.5)      | 547 (25.1)         | 0.59            |
| Carotid stenosis                              | 116 (2.5)        | 70 (3.2)           | 0.12            |
| Diabetes mellitus                             | 1118 (24.5)      | 527 (24.1)         | 0.78            |
| Dyslipidemia                                  | 1930 (42.2)      | 926 (42.4)         | 0.88            |
| Hypertension                                  | 3281 (71.8)      | 1569 (71.9)        | 0.94            |
| Prosthetic heart valve                        | 102 (2.2)        | 42 (1.9)           | 0.41            |
| Peripheral vascular disease                   | 171 (3.7)        | 80 (3.7)           | 0.88            |
| Heart failure                                 | 630 (13.8)       | 314 (14.4)         | 0.51            |
| Smoker                                        | 811 (17.7)       | 413 (18.9)         | 0.24            |
| Previous stroke/TIA                           | 1007 (22.0)      | 510 (23.4)         | 0.22            |
| Obesity                                       | 1138 (24.9)      | 514 (23.5)         | 0.23            |
| Drug/alcohol abuse                            | 327 (7.1)        | 138 (6.3)          | 0.21            |
| Renal insufficiency                           | 264 (5.8)        | 129 (5.9)          | 0.83            |
| Sleep apnea                                   | 181 (4.0)        | 82 (3.8)           | 0.69            |
| Depression                                    | 377 (8.2)        | 205 (9.4)          | 0.12            |
| Medical history panel missing                 | 1 (0.02)         | 1 (0.05)           | 0.59            |
| Medication before admission                   |                  |                    |                 |
| Anticoagulants/ Antiplatelets                 | 2361 (51.6)      | 1137 (52.1)        | 0.73            |
| antihypertensive                              | 2702 (59.1)      | 1250 (57.2)        | 0.30            |
| Cholesterol reducer                           | 1886 (41.2)      | 917 (42.0)         | 0.55            |
| Antidiabetic                                  | 662 (14.5)       | 314 (14.4)         | 0.93            |
| Hospital size, median no. of beds (IQR)       | 572 (424-747)    | 579 (427-826)      | 0.08            |
| Hospital region                               |                  |                    | <0.001          |
| West                                          | 548 (12.0)       | 295 (13.5)         |                 |
| South                                         | 2090 (45.7)      | 853 (39.1)         |                 |
| Midwest                                       | 1041 (22.8)      | 485 (22.2)         |                 |
| Northeast                                     | 893 (19.5)       | 551 (25.2)         |                 |
| Academic hospital                             | 3991 (87.3)      | 1931 (88.4)        | 0.91            |
| Primary stroke center                         | 3166 (69.3)      | 1548 (70.9)        | 0.17            |
| Comprehensive stroke center                   | 2171 (47.5)      | 1163 (53.3)        | <0.001          |

|                                                           | <b>Witnessed</b> | <b>Unwitnessed</b> | <b>p-value*</b> |
|-----------------------------------------------------------|------------------|--------------------|-----------------|
| Urban location (versus rural location)                    | 4572 (100)       | 2184 (100)         |                 |
| Annual volume of ischemic stroke discharges, median (IQR) | 407 (288-486)    | 410 (284-510)      | 0.10            |
| Annual volume of rtPA administration, median (IQR)        | 36 (27-50)       | 37 (27-56)         | <0.001          |
| Annual volume of ERT cases, median (IQR)                  | 40 (27-62)       | 43 (28-62)         | <0.001          |

^Off hours are holiday or before 7AM and after 6PM on Monday-Friday

N, number; SD, standard deviation; EMS, Emergency Medical Service; IQR, interquartile range; LKW, last known well; rtPA, recombinant tissue plasminogen activator; NIHSS, National Institutes of Health Stroke Scale; CAD, coronary artery disease; MI, myocardial infarction; TIA, transient ischemic attack; ERT, endovascular reperfusion therapy

\*P-values are based on Pearson chi-square tests for categorical variables, and chi-square rank based group means score statistics (Kruskal-Wallis tests).for continuous/ordinal variables

**eTable 5. Patient- and hospital-level characteristics of EMS-arriving patients treated with endovascular reperfusion therapy, overall and in different door to puncture time windows.**

|                                               | Door to Puncture Interval |             |             |             |             |             | P value* |
|-----------------------------------------------|---------------------------|-------------|-------------|-------------|-------------|-------------|----------|
|                                               | Overall                   | 31-60 m     | 61-90 m     | 91-120 m    | 121-150 m   | 151-180 m   |          |
| N                                             | 3097                      | 283         | 915         | 960         | 622         | 317         |          |
| Age, mean (SD), years                         | 70.3 (14.8)               | 69.8 (15.0) | 69.8 (14.9) | 70.6 (14.6) | 70.8 (14.8) | 70.3 (15.4) | 0.74     |
| Female, sex (%)                               | 1603 (51.8)               | 130 (45.9)  | 463 (50.6)  | 500 (52.1)  | 340 (54.7)  | 170 (53.6)  | 0.14     |
| Race/ethnicity                                |                           |             |             |             |             |             | 0.005    |
| White, non-Hispanic                           | 2097 (67.7)               | 198 (70.0)  | 645 (70.5)  | 668 (69.6)  | 395 (63.5)  | 191 (60.2)  |          |
| Black                                         | 520 (16.8)                | 38 (13.4)   | 135 (14.7)  | 161 (16.8)  | 115 (18.5)  | 71 (22.4)   |          |
| Hispanic                                      | 231 (7.5)                 | 16 (5.6)    | 66 (7.2)    | 73 (7.6)    | 50 (8.0)    | 26 (8.2)    |          |
| Asian                                         | 77 (2.5)                  | 10 (3.5)    | 15 (1.6)    | 20 (2.1)    | 22 (3.5)    | 10 (3.1)    |          |
| Other                                         | 172 (5.5)                 | 21 (7.4)    | 54 (5.9)    | 38 (4.0)    | 40 (6.4)    | 19 (6.0)    |          |
| Arrival at off hours <sup>^</sup>             | 1451 (46.8)               | 45 (15.9)   | 308 (33.7)  | 505 (52.6)  | 391 (62.9)  | 202 (63.7)  | <0.001   |
| Arrival by EMS                                | 3097 (100)                | 283 (100)   | 915 (100)   | 960 (100)   | 622 (100)   | 317 (100)   | 0.02     |
| LKW to arrival, median (IQR), min             | 69 (44-121)               | 65 (40-128) | 70 (45-119) | 69 (45-130) | 67 (43-117) | 69 (44-119) | 0.62     |
| Received IV rtPA (at ERT or outside hospital) | 2158 (69.7)               | 192 (67.8)  | 641 (70.1)  | 657 (68.4)  | 436 (70.1)  | 232 (73.2)  | 0.54     |
| Door to rtPA, median (IQR), min               | 40 (30-52)                | 27 (19-33)  | 34 (26-44)  | 41 (33-54)  | 47 (36-61)  | 52 (35-70)  | <0.001   |
| NIHSS, median (IQR)                           | 17 (13-22)                | 18 (14-24)  | 17 (13-22)  | 17 (13-22)  | 17 (12-22)  | 16 (11-22)  | <0.001   |
| Severe stroke, NIHSS > 16 (%)                 | 1873 (60.5)               | 197 (69.6)  | 564 (61.6)  | 569 (59.3)  | 369 (59.3)  | 174 (54.9)  | 0.004    |
| Absence of limb weakness (%)                  | 147 (4.8)                 | 6 (2.1)     | 34 (3.7)    | 53 (5.5)    | 34 (5.5)    | 20 (6.3)    | 0.02     |
| Medical History (%)                           |                           |             |             |             |             |             |          |
| Atrial fibrillation/flutter                   | 1103 (35.6)               | 101 (35.7)  | 317 (34.7)  | 346 (36.0)  | 219 (35.3)  | 120 (37.9)  | 0.89     |
| CAD/prior MI                                  | 767 (24.8)                | 63 (22.3)   | 217 (23.7)  | 242 (25.2)  | 156 (25.1)  | 89 (28.1)   | 0.48     |
| Carotid stenosis                              | 85 (2.7)                  | 11 (3.9)    | 16 (1.7)    | 29 (3.0)    | 18 (2.9)    | 11 (3.5)    | 0.22     |
| Diabetes mellitus                             | 705 (22.8)                | 61 (21.5)   | 198 (21.7)  | 221 (23.0)  | 145 (23.3)  | 80 (25.2)   | 0.71     |
| Dyslipidemia                                  | 1338 (43.2)               | 124 (43.8)  | 386 (42.2)  | 414 (43.1)  | 258 (41.5)  | 156 (49.2)  | 0.22     |
| Hypertension                                  | 2223 (71.8)               | 200 (70.7)  | 626 (68.5)  | 692 (72.1)  | 472 (76.0)  | 233 (73.5)  | 0.03     |
| Prosthetic heart valve                        | 72 (2.3)                  | 5 (1.8)     | 23 (2.5)    | 25 (2.6)    | 14 (2.2)    | 5 (1.6)     | 0.80     |
| Peripheral vascular disease                   | 126 (4.1)                 | 9 (3.2)     | 36 (3.9)    | 33 (3.4)    | 26 (4.2)    | 22 (6.9)    | 0.08     |
| Heart failure                                 | 444 (14.3)                | 36 (12.7)   | 125 (13.7)  | 128 (13.3)  | 111 (17.9)  | 44 (13.9)   | 0.09     |
| Smoker                                        | 543 (17.5)                | 50 (17.7)   | 147 (16.1)  | 184 (19.2)  | 103 (16.6)  | 59 (18.6)   | 0.44     |
| Previous stroke/TIA                           | 736 (23.8)                | 58 (20.5)   | 190 (20.8)  | 234 (24.4)  | 167 (26.9)  | 87 (27.4)   | 0.02     |

|                                                           | Door to Puncture Interval |               |               |               |               |               | P value* |
|-----------------------------------------------------------|---------------------------|---------------|---------------|---------------|---------------|---------------|----------|
|                                                           | Overall                   | 31-60 m       | 61-90 m       | 91-120 m      | 121-150 m     | 151-180 m     |          |
| Medical History (%)                                       |                           |               |               |               |               |               |          |
| Obesity                                                   | 713 (23.0)                | 61 (21.5)     | 201 (22.0)    | 227 (23.6)    | 143 (23.0)    | 81 (25.5)     | 0.69     |
| Drug/alcohol abuse                                        | 212 (6.8)                 | 17 (6.0)      | 53 (5.8)      | 76 (7.9)      | 46 (7.4)      | 20 (6.3)      | 0.40     |
| Renal insufficiency                                       | 191 (6.2)                 | 16 (5.6)      | 55 (6.0)      | 62 (6.5)      | 37 (6.0)      | 21 (6.6)      | 0.98     |
| Sleep apnea                                               | 111 (3.6)                 | 2 (0.7)       | 36 (3.9)      | 36 (3.7)      | 24 (3.9)      | 13 (4.1)      | 0.11     |
| Depression                                                | 284 (9.2)                 | 21 (7.4)      | 87 (9.5)      | 90 (9.4)      | 59 (9.5)      | 27 (8.5)      | 0.83     |
| Medical history panel missing                             | 2 (0.06)                  | 0 (0)         | 1 (0.11)      | 0 (0)         | 1 (0.16)      | 0 (0)         | 0.70     |
| Medication before admission                               |                           |               |               |               |               |               |          |
| Anticoagulants/Antiplatelets                              | 1605 (51.8)               | 139 (49.1)    | 457 (49.9)    | 519 (54.1)    | 323 (51.9)    | 167 (52.7)    | 0.39     |
| antihypertensive                                          | 1808 (58.4)               | 141 (49.8)    | 492 (53.8)    | 599 (62.4)    | 378 (60.8)    | 198 (62.5)    | <0.001   |
| Cholesterol reducer                                       | 1305 (42.1)               | 114 (40.3)    | 388 (42.4)    | 394 (41.0)    | 270 (43.4)    | 139 (43.8)    | 0.80     |
| Antidiabetic                                              | 408 (13.2)                | 37 (13.1)     | 110 (12.0)    | 139 (14.5)    | 85 (13.7)     | 37 (11.7)     | 0.45     |
| Hospital size, median no. of beds (IQR)                   | 561 (416-739)             | 601 (472-759) | 572 (424-759) | 560 (404-711) | 551 (404-777) | 510 (391-733) | <0.001   |
| Hospital region                                           |                           |               |               |               |               |               | <0.001   |
| West                                                      | 355 (11.5)                | 23 (8.1)      | 99 (10.8)     | 115 (12.0)    | 69 (11.1)     | 49 (15.5)     |          |
| South                                                     | 1526 (49.2)               | 157 (55.5)    | 507 (55.4)    | 446 (46.5)    | 277 (44.5)    | 139 (43.8)    |          |
| Midwest                                                   | 579 (18.7)                | 43 (15.2)     | 145 (15.8)    | 182 (19.0)    | 145 (23.3)    | 64 (20.2)     |          |
| Northeast                                                 | 637 (20.6)                | 60 (21.2)     | 164 (17.9)    | 217 (22.6)    | 131 (21.1)    | 65 (20.5)     |          |
| Academic hospital                                         | 2594 (83.8)               | 235 (83.0)    | 758 (82.8)    | 813 (84.7)    | 526 (84.6)    | 262 (82.6)    | 0.78     |
| Primary stroke center                                     | 2021 (65.3)               | 188 (66.4)    | 622 (68.0)    | 605 (63.0)    | 403 (64.8)    | 203 (64.0)    | 0.24     |
| Comprehensive stroke center                               | 1352 (43.7)               | 139 (49.1)    | 402 (44.0)    | 429 (44.7)    | 260 (41.8)    | 122 (38.5)    | 0.08     |
| Urban location (versus rural location)                    | 3097 (100)                | 283 (100)     | 915 (100)     | 960 (100)     | 622 (100)     | 317 (100)     |          |
| Annual volume of ischemic stroke discharges, median (IQR) | 407 (289-510)             | 462 (346-555) | 418 (295-518) | 405 (288-492) | 393 (288-510) | 349 (259-460) | <0.001   |
| Annual volume of rtPA administration, median (IQR)        | 39 (29-59)                | 43 (29-64)    | 39 (29-60)    | 39 (29-59)    | 38 (28-57)    | 38 (27-55)    | 0.01     |
| Annual volume of ERT cases, median (IQR)                  | 40 (26-61)                | 51 (37-90)    | 45 (28-69)    | 38 (26-61)    | 33 (23-55)    | 29 (19-41)    | <0.001   |

^Off hours are holiday or before 7AM and after 6PM on Monday-Friday

N, number; SD, standard deviation; EMS, Emergency Medical Service; m, minutes; IQR, interquartile range; LKW, last known well; rtPA, recombinant tissue plasminogen activator; NIHSS, National Institutes of Health Stroke Scale; CAD, coronary artery disease; MI, myocardial infarction; TIA, transient ischemic attack; ERT, endovascular reperfusion therapy

\*P-values are based on Pearson chi-square tests for categorical variables, and chi-square rank based group means score statistics (Kruskal-Wallis tests).for continuous/ordinal variables

**eTable 6. Additional effectiveness outcomes of patients treated with endovascular reperfusion therapy, overall, and in different onset to puncture time windows.**

| Category      | Outcome                                         | Unadjusted           |                    |                      |                      |                    | P value* | Adjusted Odds Ratios <sup>^^</sup> |                      |                      |
|---------------|-------------------------------------------------|----------------------|--------------------|----------------------|----------------------|--------------------|----------|------------------------------------|----------------------|----------------------|
|               |                                                 | Overall              | OTP 0-120m         | OTP 121-240m         | OTP 241-360m         | OTP 361-480m       |          | 0-120m vs 361-480m                 | 121-240m vs 361-480m | 241-360m vs 361-480m |
| Clinical      | Discharge to Home or ARF                        | 61.3%<br>(4143/6756) | 71.9%<br>(333/463) | 61.2%<br>(1963/3207) | 59.2%<br>(1323/2235) | 61.6%<br>(524/851) | <0.001   | 2.08<br>(1.52-2.85)                | 1.10<br>(0.90-1.34)  | 0.90<br>(0.75-1.09)  |
|               | Ambulatory (w/ or w/o assist) at DC             | 74.0%<br>(4278/5783) | 82.0%<br>(341/416) | 73.8%<br>(2017/2735) | 73.0%<br>(1384/1897) | 72.9%<br>(536/735) | <0.001   | NP <sup>^^</sup>                   | NP <sup>^^</sup>     | NP <sup>^^</sup>     |
|               | Disability-Free at 3months <sup>**</sup>        | 28.7%<br>(1086/3780) | 40.1%<br>(113/282) | 29.8%<br>(549/1842)  | 26.6%<br>(323/1216)  | 23.0%<br>(101/440) | <0.001   | 3.44<br>(2.23- 5.30)               | 1.81<br>(1.31-2.50)  | 1.35<br>(0.97-1.87)  |
|               | Functional Independence at 3months <sup>^</sup> | 39.8%<br>(1505/3780) | 49.6%<br>(140/282) | 40.8%<br>(751/1842)  | 38.1%<br>(463/1216)  | 34.3%<br>(151/440) | <0.001   | 2.88<br>(1.88-4.41)                | 1.61<br>(1.21-2.14)  | 1.22<br>(0.92-1.62)  |
| Adverse Event | In-Hospital Mortality                           | 12.1%<br>(814/6756)  | 7.6%<br>(35/463)   | 12.4%<br>(397/3207)  | 12.8%<br>(285/2235)  | 11.4%<br>(97/851)  | 0.01     | NP <sup>^^</sup>                   | NP <sup>^^</sup>     | NP <sup>^^</sup>     |

OTP, Onset (last known well) to puncture time; ARF, acute rehabilitation facility; w/ or w/o, with or without; mRS, modified Rankin Scale; ICH, intracranial hemorrhage; DC, discharge; m, minutes; NP, not performed

\*P values from Pearson chi-square test

\*\*Disability-Free – modified Rankin Scale 0-1

<sup>^</sup>Functional Independence – modified Rankin Scale 0-2

<sup>^^</sup>Adjustment variables listed in eTable 2

<sup>^^</sup> Some auxiliary outcomes did not have statistical analysis performed due to funding constraints



**eTable 7. Clinical and adverse event outcomes of EMS-arriving patients treated with endovascular reperfusion therapy, overall and in different door to puncture time intervals.**

| Category       | Outcome                                    | Unadjusted           |                            |                            |                            |                             |                             |          | Adjusted Odds Ratios <sup>^^</sup> |                           |                            |                             |
|----------------|--------------------------------------------|----------------------|----------------------------|----------------------------|----------------------------|-----------------------------|-----------------------------|----------|------------------------------------|---------------------------|----------------------------|-----------------------------|
|                |                                            | Overall<br>(n=3097)  | DTP 31-<br>60 m<br>(n=283) | DTP 61-<br>90 m<br>(n=915) | DTP 91-<br>120m<br>(n=960) | DTP 121-<br>150m<br>(n=622) | DTP 151-<br>180m<br>(n=317) | P value* | 31-60m<br>vs 151-<br>180m          | 61-90m<br>vs 151-<br>180m | 91-120m<br>vs 151-<br>180m | 121-150m<br>vs 151-<br>180m |
| Clinical       | Discharge to Home                          | 30.5%<br>(944/3097)  | 35.0%<br>(99/283)          | 35.5%<br>(325/915)         | 29.4%<br>(282/960)         | 25.1%<br>(156/622)          | 25.9%<br>(82/317)           | <0.001   | 2.08<br>(1.37-<br>3.13)            | 1.81<br>(1.28-<br>2.57)   | 1.28<br>(0.93-<br>1.77)    | 0.99<br>(0.71-<br>1.40)     |
|                | Ambulatory (unassisted) at DC              | 38.6%<br>(1023/2651) | 40.6%<br>(102/251)         | 43.1%<br>(345/801)         | 37.6%<br>(308/819)         | 34.1%<br>(176/516)          | 34.8%<br>(92/264)           | 0.009    | 1.87<br>(1.21-<br>2.87)            | 1.76<br>(1.24-<br>2.49)   | 1.31<br>(0.94-<br>1.82)    | 1.11<br>(0.78-<br>1.59)     |
|                | Disability-Free** at DC                    | 17.7%<br>(433/2444)  | 16.7%<br>(35/209)          | 22.5%<br>(167/743)         | 16.8%<br>(130/772)         | 14.3%<br>(69/482)           | 13.4%<br>(32/238)           | <0.001   | 2.74<br>(1.50-<br>5.00)            | 3.17<br>(1.95-<br>5.17)   | 1.93<br>(1.15-<br>3.23)    | 1.35<br>(0.82-<br>2.22)     |
|                | Functional Independence <sup>^</sup> at DC | 24.1%<br>(589/2444)  | 22.0%<br>(46/209)          | 30.6%<br>(227/743)         | 23.1%<br>(178/772)         | 19.1%<br>(92/482)           | 19.3%<br>(46/238)           | <0.001   | 2.18<br>(1.28-<br>3.72)            | 2.77<br>(1.80-<br>4.26)   | 1.64<br>(1.01-<br>2.66)    | 1.09<br>(0.70-<br>1.68)     |
| Technical      | Substantial reperfusion <sup>^^</sup>      | 86.0%<br>(2482/2885) | 85.6%<br>(226/264)         | 88.1%<br>(766/869)         | 87.1%<br>(785/901)         | 82.3%<br>(466/566)          | 83.9%<br>(239/285)          | 0.02     | 0.88<br>(0.53-<br>1.45)            | 1.14<br>(0.76-<br>1.70)   | 1.13<br>(0.79-<br>1.61)    | 0.87<br>(0.59-<br>1.29)     |
| Adverse Events | Symptomatic ICH                            | 5.9%<br>(182/3078)   | 5.7%<br>(16/280)           | 4.8%<br>(44/911)           | 4.9%<br>(47/957)           | 7.8%<br>(48/614)            | 8.5%<br>(27/316)            | 0.02     | 0.72<br>(0.34-<br>1.53)            | 0.63<br>(0.33-<br>1.18)   | 0.56<br>(0.34-<br>0.94)    | 0.89<br>(0.52-<br>1.52)     |
|                | In hospital mortality/hospice              | 20.2%<br>(624/3097)  | 18.0%<br>(51/283)          | 17.2%<br>(157/915)         | 19.3%<br>(185/960)         | 23.5%<br>(146/622)          | 26.8%<br>(85/317)           | <0.001   | 0.43<br>(0.26-<br>0.71)            | 0.47<br>(0.30-<br>0.72)   | 0.53<br>(0.37-<br>0.77)    | 0.73<br>(0.50-<br>1.05)     |

EMS, emergency medical services; DTP, door to puncture time; DC, discharge; ICH, intracranial hemorrhage; m, minutes

\*P values from Pearson chi-square test

\*\*Disability-Free – modified Rankin Scale 0-1

<sup>^</sup>Functional Independence – modified Rankin Scale 0-2

<sup>^^</sup>Substantial reperfusion – modified thrombolysis in cerebral ischemia 2b-3

<sup>^^^</sup>Adjustment variables listed in eTable 2

**eTable 8. Additional clinical outcomes of EMS-arriving patients treated with endovascular reperfusion therapy, overall and in different door to puncture time intervals.**

| Category | Outcome                                     | Unadjusted           |                           |                           |                            |                             |                             |             | Adjusted Odds Ratios <sup>^^</sup> |                         |                          |                               |
|----------|---------------------------------------------|----------------------|---------------------------|---------------------------|----------------------------|-----------------------------|-----------------------------|-------------|------------------------------------|-------------------------|--------------------------|-------------------------------|
|          |                                             | Overall<br>(n=3097)  | DTP 31-<br>60m<br>(n=283) | DTP 61-<br>90m<br>(n=915) | DTP 91-<br>120m<br>(n=960) | DTP 121-<br>150m<br>(n=622) | DTP 151-<br>180m<br>(n=317) | P<br>value* | 31-60<br>vs 151-<br>180            | 61-90<br>vs 151-<br>180 | 91-120<br>vs 151-<br>180 | 121-<br>150<br>vs 151-<br>180 |
| Clinical | <b>Discharge to Home or ARF</b>             | 61.1%<br>(1891/3097) | 64.7%<br>(183/283)        | 66.3%<br>(607/915)        | 62.5%<br>(600/960)         | 54.3%<br>(338/622)          | 51.4%<br>(163/317)          | <0.001      | 2.45<br>(1.61,<br>3.72)            | 2.36<br>(1.68,<br>3.32) | 1.90<br>(1.39,<br>2.61)  | 1.26<br>(0.91,<br>1.75)       |
|          | <b>Ambulatory w/ or w/o assist at DC</b>    | 73.9%<br>(1958/2651) | 74.9%<br>(188/251)        | 76.2%<br>(610/801)        | 76.1%<br>(623/819)         | 69.8%<br>(360/516)          | 67.1%<br>(177/264)          | 0.003       | NP <sup>^^</sup>                   | NP <sup>^^</sup>        | NP <sup>^^</sup>         | NP <sup>^^</sup>              |
|          | <b>Disability-Free** at 3 months</b>        | 27.7%(531/<br>1916)  | 29.2%<br>(54/185)         | 32.2%<br>(191/593)        | 27.8%<br>(165/593)         | 21.8%<br>(81/372)           | 23.1%<br>(40/173)           | 0.006       | 1.87<br>(0.99,<br>3.55)            | 1.81<br>(1.09,<br>3.02) | 1.42<br>(0.86,<br>2.34)  | 0.94<br>(0.59,<br>1.51)       |
|          | <b>Functional Independence^ at 3 months</b> | 36.5%<br>(700/1916)  | 40%<br>(74/185)           | 41.3%<br>(245/593)        | 36.8%<br>(218/593)         | 31.2%<br>(116/372)          | 27.2%<br>(47/173)           | 0.001       | 2.51<br>(1.29,<br>4.91)            | 2.07<br>(1.17,<br>3.66) | 1.67<br>(0.93,<br>3.00)  | 1.20<br>(0.70,<br>2.06)       |

EMS, emergency medical services; DTP, door to puncture time; ARF, acute rehabilitation facility; w/ or w/o, with or without; DC, discharge; m, minutes; NP, not performed

\*P values from Pearson chi-square test

\*\*Disability-Free – modified Rankin Scale 0-1

^Functional Independence – modified Rankin Scale 0-2

^^Adjustment variables listed in eTable 2

^^ Some auxiliary outcomes did not have statistical analysis performed due to funding constraints

**eTable 9A. Comparison of time-benefit relationships in all patients in the 30-270 minute onset-to-puncture time window versus the 271-480 minute onset-to-puncture window, in relation to onset-to-puncture time as a continuous curve, adjusted analysis.**

| Category       | Outcome^^                      | P value for Non-linearity* | OTP 30-270 Minutes                |         | OTP 271-480 Minutes               |         |
|----------------|--------------------------------|----------------------------|-----------------------------------|---------|-----------------------------------|---------|
|                |                                |                            | Odds Ratio (per 15m decrease OTP) | P Value | Odds Ratio (per 15m decrease OTP) | P Value |
| Clinical       | Discharge to Home              | <0.001                     | 1.08 (1.05-1.10)                  | <0.001  | 1.01 (0.98-1.03)                  | 0.62    |
|                | Ambulatory (unassisted)        | 0.006                      | 1.05 (1.04-1.08)                  | <0.001  | 1.01 (0.99-1.03)                  | 0.43    |
|                | Disability-Free at DC***       | <0.001                     | 1.10 (1.05-1.14)                  | <0.001  | 1.02 (0.99-1.05)                  | 0.25    |
|                | Functional Independence at DC^ | <0.001                     | 1.06 (1.03-1.10)                  | <0.001  | 1.03 (1.01-1.06)                  | 0.009   |
| Technical      | Substantial reperfusion        | 0.27                       | 1.01 (0.99-1.04)                  | 0.23    | 1.00 (0.98-1.02)                  | 0.84    |
| Adverse Events | Symptomatic ICH                | 0.12                       | 0.96 (0.93-0.99)                  | 0.03    | 0.97 (0.94-1.01)                  | 0.13    |
|                | In-Hospital Mortality/Hospice  | <0.001                     | 0.94 (0.93-0.97)                  | <0.001  | 1.02 (0.99-1.04)                  | 0.14    |

OTP, Onset (last known well) to puncture time; ICH, intracranial hemorrhage; m, minutes; DC, discharge

\*Results of test for non-linearity on the logit scale over the time period 30-480 minutes. When non-linearity was present over the entire time window, splines were placed at a cutpoint of 270 minutes, whereupon the 0-270m and 271-480m segments could be modeled using linear relationships.

\*\*\*Disability-Free – modified Rankin Scale 0-1 / ^Functional Independence – modified Rankin Scale 0-2 / ^^Adjustment variables listed in eTable 2

**eTable 9B. Absolute change in clinical and adverse event outcomes of all patients treated with endovascular reperfusion therapy in relation to onset-to-puncture time as a continuous curve, adjusted analysis, in the 30-270 minute onset-to-puncture window.**

| Category       | Outcome <sup>^^^</sup>                     | Within OTP 0-270 Minute Time Period – All Patients |         |                                           |                                          |
|----------------|--------------------------------------------|----------------------------------------------------|---------|-------------------------------------------|------------------------------------------|
|                |                                            | Odds Ratio<br>(per 15m decrease OTP)               | P Value | Absolute Change<br>(per 15m decrease OTP) | Minutes Needed to<br>Treat <sup>^^</sup> |
| Clinical       | Discharge to Home                          | 1.08 (1.05-1.10)                                   | <0.001  | 1.15% (0.78,1.52)                         | 13.0                                     |
|                | Ambulatory (unassisted)                    | 1.05 (1.04-1.08)                                   | <0.001  | 1.14% (0.75,1.53)                         | 13.2                                     |
|                | Disability-Free at DC <sup>***</sup>       | 1.10 (1.05-1.14)                                   | <0.001  | 0.98% (0.57,1.39)                         | 15.3                                     |
|                | Functional Independence at DC <sup>^</sup> | 1.06 (1.03-1.10)                                   | <0.001  | 0.91% (0.45,1.36)                         | 16.5                                     |
| Technical      | Substantial reperfusion                    | 1.01 (0.99-1.04)                                   | 0.23    | 0.17% (-0.12,0.47)                        | NS                                       |
| Adverse Events | Symptomatic ICH                            | 0.96 (0.93-0.99)                                   | 0.03    | -0.22% (-0.40,-0.03)                      | 68.2                                     |
|                | In-Hospital Mortality/Hospice              | 0.94 (0.93-0.97)                                   | <0.001  | -0.77% (-1.07,-0.47)                      | 19.5                                     |

OTP, Onset (last known well) to puncture time; ICH, intracranial hemorrhage; m, minutes; DC, discharge; NS, not significant

<sup>\*\*\*</sup>Disability-Free – modified Rankin Scale 0-1

<sup>^</sup>Functional Independence – modified Rankin Scale 0-2

<sup>^^</sup>Minutes faster needed to treat for 1 patient of every 100 to have a different outcome

<sup>^^^</sup>Adjustment variables listed in eTable 2

**eTable 10. Comparison of time-benefit relationships in the 30-270 minute onset-to-puncture time window in witnessed versus unwitnessed onset patients, in relation to onset-to-puncture time as a continuous curve, adjusted analysis.**

| Category       | Outcome^^                      | Witnessed onset OTP 30-270 Minutes |         | Unwitnessed onset OTP 30-270 Minutes |         |
|----------------|--------------------------------|------------------------------------|---------|--------------------------------------|---------|
|                |                                | Odds Ratio (per 15m decrease OTP)  | P Value | Odds Ratio (per 15m decrease OTP)    | P Value |
| Clinical       | Discharge to Home              | 1.09 (1.06, 1.12)                  | <0.001  | 1.04 (1.01, 1.08)                    | 0.01    |
|                | Ambulatory (unassisted)        | 1.08 (1.05, 1.11)                  | <0.001  | 1.01 (0.98, 1.05)                    | 0.46    |
|                | Disability-Free at DC***       | 1.10 (1.05, 1.15)                  | <0.001  | 1.08 (1.01, 1.14)                    | 0.02    |
|                | Functional Independence at DC^ | 1.08 (1.04, 1.12)                  | <0.001  | 1.02 (0.97, 1.07)                    | 0.37    |
| Technical      | Substantial reperfusion        | 1.03 (1.00, 1.06)                  | 0.05    | 0.97 (0.92, 1.03)                    | 0.33    |
| Adverse Events | Symptomatic ICH                | 0.96 (0.92, 1.00)                  | 0.05    | 0.95 (0.88, 1.03)                    | 0.23    |
|                | In-Hospital Mortality/Hospice  | 0.94 (0.91, 0.97)                  | <0.001  | 0.96 (0.92, 0.99)                    | 0.02    |

OTP, Onset (last known well) to puncture time; ICH, intracranial hemorrhage; m, minutes; DC, discharge; NS, not significant

\*\*\*Disability-Free – modified Rankin Scale 0-1 / ^Functional Independence – modified Rankin Scale 0-2 / ^^Adjustment variables listed in eTable 2

**eTable 11A. Comparison of time-benefit relationships in EMS-arriving patients in the 30-120 minute door-to-puncture time window versus the 121-180 minute onset-to-puncture window, in relation to door-to-puncture time as a continuous curve, adjusted analysis**

| Category       | Outcome^^                      | P value for Non-linearity* | DTP 30-120 Minutes                |         | DTP 121-180 Minutes               |         |
|----------------|--------------------------------|----------------------------|-----------------------------------|---------|-----------------------------------|---------|
|                |                                |                            | Odds Ratio (per 15m decrease DTP) | P Value | Odds Ratio (per 15m decrease DTP) | P Value |
| Clinical       | Discharge to Home              | 0.03                       | 1.12 (1.05-1.22)                  | 0.002   | 1.09 (0.97,1.20)                  | 0.15    |
|                | Ambulatory (unassisted)        | 0.006                      | 1.09 (1.00-1.18)                  | 0.04    | 1.10 (0.97-1.25)                  | 0.12    |
|                | Disability-Free at DC***       | 0.07                       | 1.16 (1.05-1.30)                  | 0.005   | 1.22 (1.02-1.43)                  | 0.03    |
|                | Functional Independence at DC^ | 0.01                       | 1.16 (1.06-1.28)                  | 0.002   | 1.18 (1.00-1.37)                  | 0.06    |
| Technical      | Substantial reperfusion        | 0.08                       | 1.01 (0.93-1.09)                  | 0.89    | 1.04 (0.93-1.16)                  | 0.54    |
| Adverse Events | Symptomatic ICH                | 0.15                       | 1.01 (0.89-1.14)                  | 0.92    | 0.85 (0.73-1.01)                  | 0.06    |
|                | In-Hospital Mortality/Hospice  | 0.08                       | 0.91 (0.83-0.98)                  | 0.02    | 0.87 (0.78-0.98)                  | 0.03    |

DTP, Door (ED arrival) to puncture time; ICH, intracranial hemorrhage; m, minutes; DC, discharge; NS, not significant

\*Results of test for non-linearity on the logit scale over the time period 30-180 minutes. When non-linearity was present over the entire time window, splines were placed at a cutpoint of 120minutes, whereupon the 0-120m and 121-180m segments could be modeled using linear relationships.

\*\*\*Disability-Free – modified Rankin Scale 0-1 / ^Functional Independence – modified Rankin Scale 0-2 / ^^Adjustment variables listed in eTable 2

**eTable 11B. Clinical and adverse event outcomes of EMS-arriving patients treated with endovascular reperfusion therapy in relation to door-to-puncture as a continuous curve, in adjusted analysis, in the 30-120 minute window.**

| Category       | Outcome                                     | Within DTP 31-120 Minute Time Period – All Patients <sup>^^</sup> |         |                                              |                                          |
|----------------|---------------------------------------------|-------------------------------------------------------------------|---------|----------------------------------------------|------------------------------------------|
|                |                                             | Odds Ratio<br>(per 15 m decrease DTP)                             | P Value | Absolute Change<br>(per 15 min decrease DTP) | Minutes Needed to<br>Treat <sup>^^</sup> |
| Clinical       | Discharge to Home                           | 1.12 (1.05-1.22)                                                  | 0.002   | 2.13% (0.81-3.44)                            | 7.0                                      |
|                | Ambulatory (unassisted)                     | 1.09 (1.00-1.18)                                                  | 0.04    | 1.72% (0.08-3.37)                            | 8.7                                      |
|                | Disability-Free at D/C <sup>***</sup>       | 1.16 (1.05-1.30)                                                  | 0.005   | 1.78% (0.43-3.14)                            | 8.4                                      |
|                | Functional Independence at D/C <sup>^</sup> | 1.16 (1.06-1.28)                                                  | 0.002   | 2.19% (0.71-3.66)                            | 6.8                                      |
| Technical      | Substantial reperfusion                     | 1.01 (0.93-1.09)                                                  | 0.89    | 0.07% (-0.80,0.94)                           | NS                                       |
| Adverse Events | Symptomatic ICH                             | 1.01 (0.89-1.14)                                                  | 0.92    | -0.01% (-0.60,0.57)                          | NS                                       |
|                | In-Hospital Mortality/Hospice               | 0.91 (0.83-0.98)                                                  | 0.02    | -1.48% (-2.60,-0.36)                         | 10.1                                     |

EMS, emergency medical services; DTP, door to puncture time; ICH, intracranial hemorrhage; m, minutes; NS, not significant

<sup>\*\*\*</sup>Disability-Free – modified Rankin Scale 0-1 / <sup>^</sup>Functional Independence – modified Rankin Scale 0-2

<sup>^^</sup>Minutes faster needed to treat for 1 patient of every 100 to have a different outcome

<sup>^^</sup>Adjustment variables listed in eTable 2

**eFigure 1. Distribution of time intervals in endovascular reperfusion therapy patients. A) Onset (last known well) to arterial puncture times, in all patients (main display), patients with witnessed onset (W, upper inset), and patients with unwitnessed onset (UW, lower inset); B) Door (ED arrival time) to arterial puncture times in EMS arriving patients.**

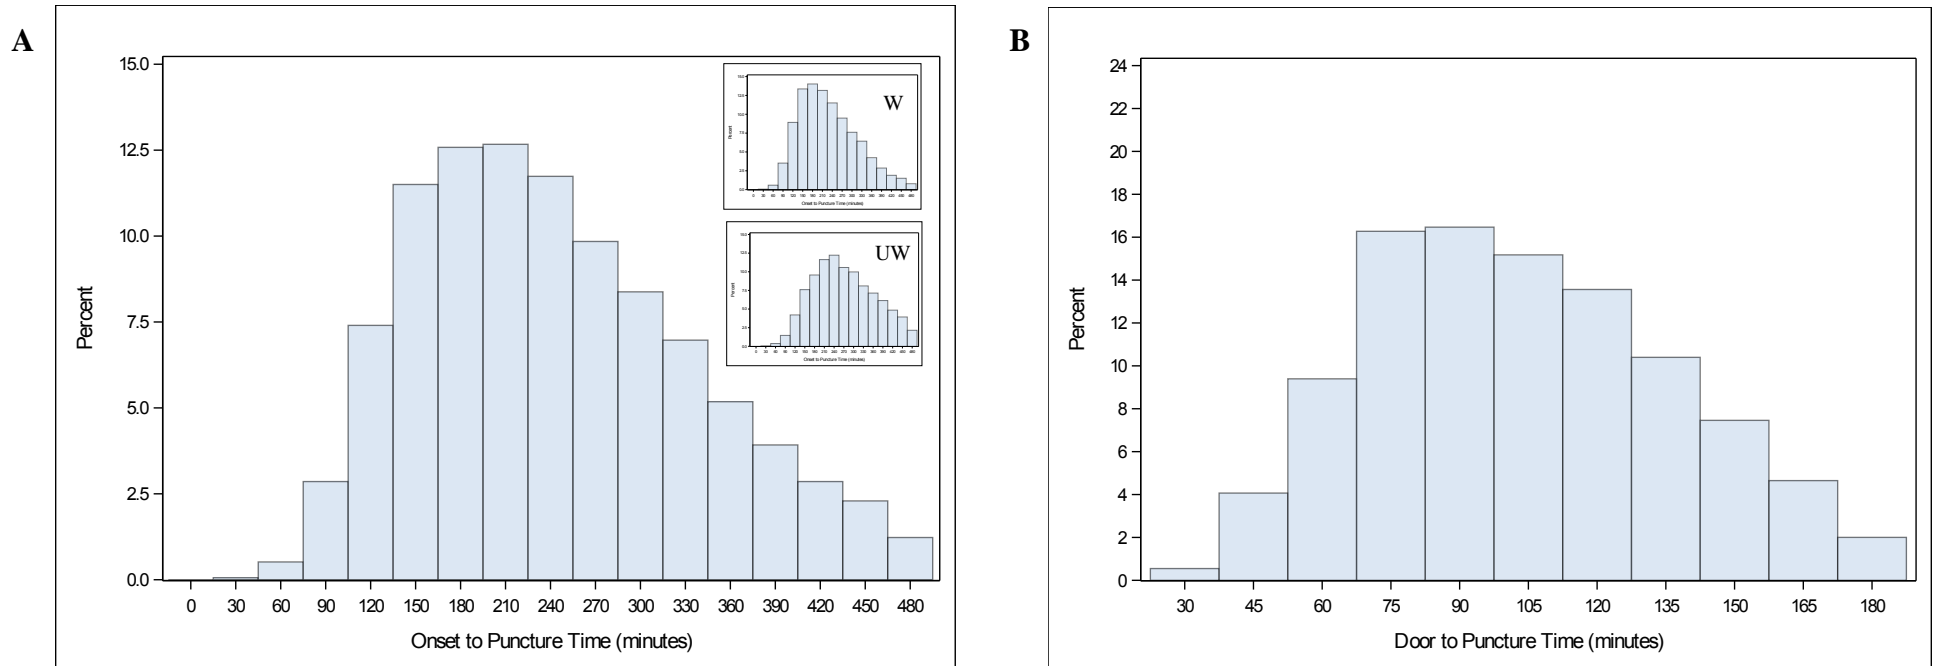



**eFigure 2. Onset to Door Times (OTD) among patients with: Top) Witnessed stroke onset, and Bottom) Unwitnessed stroke onset. Histograms show differing patterns, with a pronounced early 30-90 minute OTD peak with witnessed onset versus a wide 30-300 minute OTD plateau with unwitnessed onset.**

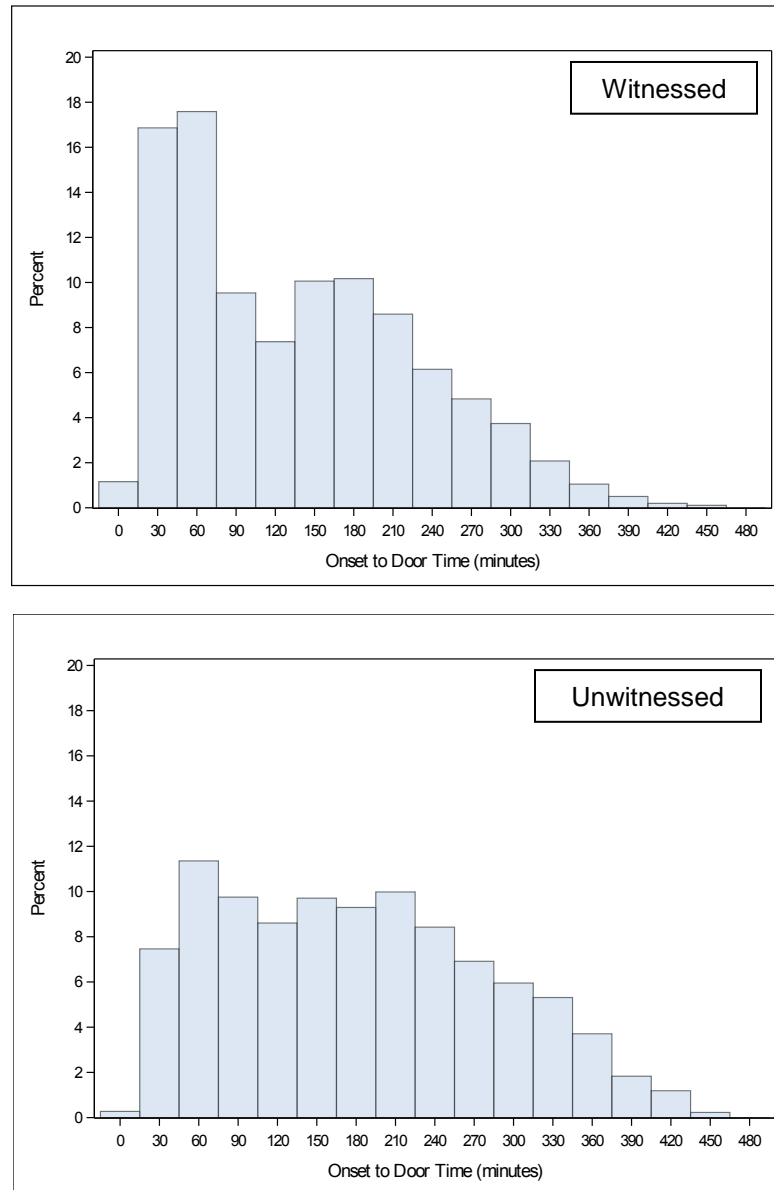

eFigure 3. Door to puncture times up to 180 minutes among: A) patients arriving directly via EMS to the endovascular reperfusion therapy hospital, and B) patients arriving by interfacility transfer to the endovascular reperfusion therapy hospital. The distribution of door to puncture times is left-shifted (compressed toward shorter intervals) in interfacility transfer patients, reflecting pre-completion of several initial diagnostic and therapeutic management activities at the outside hospital and prenotification of transfer, giving opportunity to have neurodiagnostic evaluation and neuroendovascular intervention teams already in place.

**A**

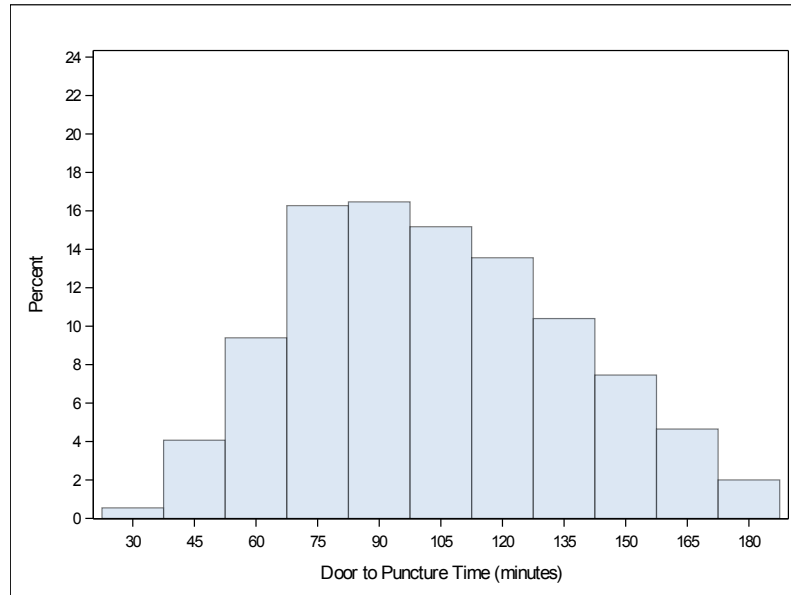

**B**

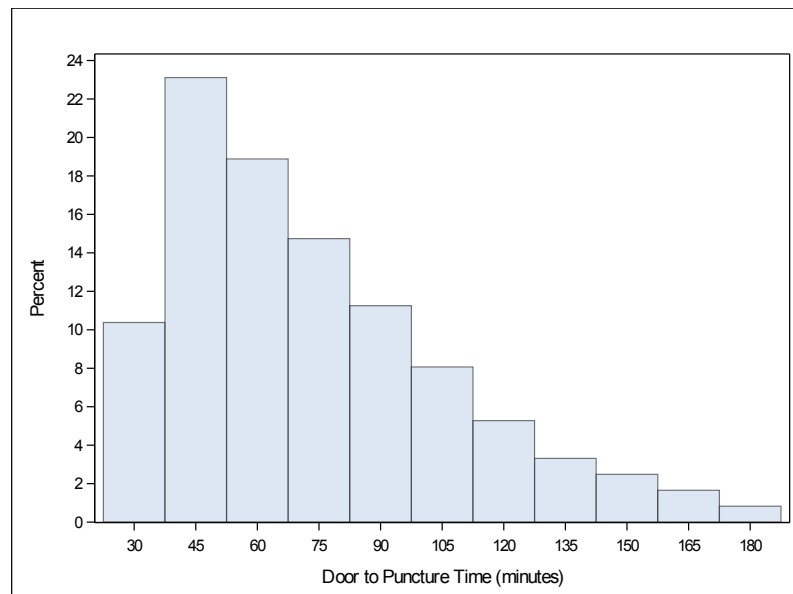

**eFigure 4. Changes in main clinical and adverse event outcomes with continuous variation in onset-to-puncture time, unadjusted analysis. Relationships between onset to puncture and the binary outcomes were assessed using logistic regression models with restricted cubic splines with knots at the 5th, 35th, 65th, 95th percentiles. Curves show the unadjusted predicted outcome rate for a hypothetical patient with mean values for baseline characteristics, for onset to puncture and: Top row: Left-independent ambulation at discharge; Middle-discharge to home; Right-functional independence (mRS 0-2) at discharge; Bottom row: Left-disability-free (mRS 0-1) at discharge; Middle-in-hospital mortality; Right-symptomatic intracranial hemorrhage.**

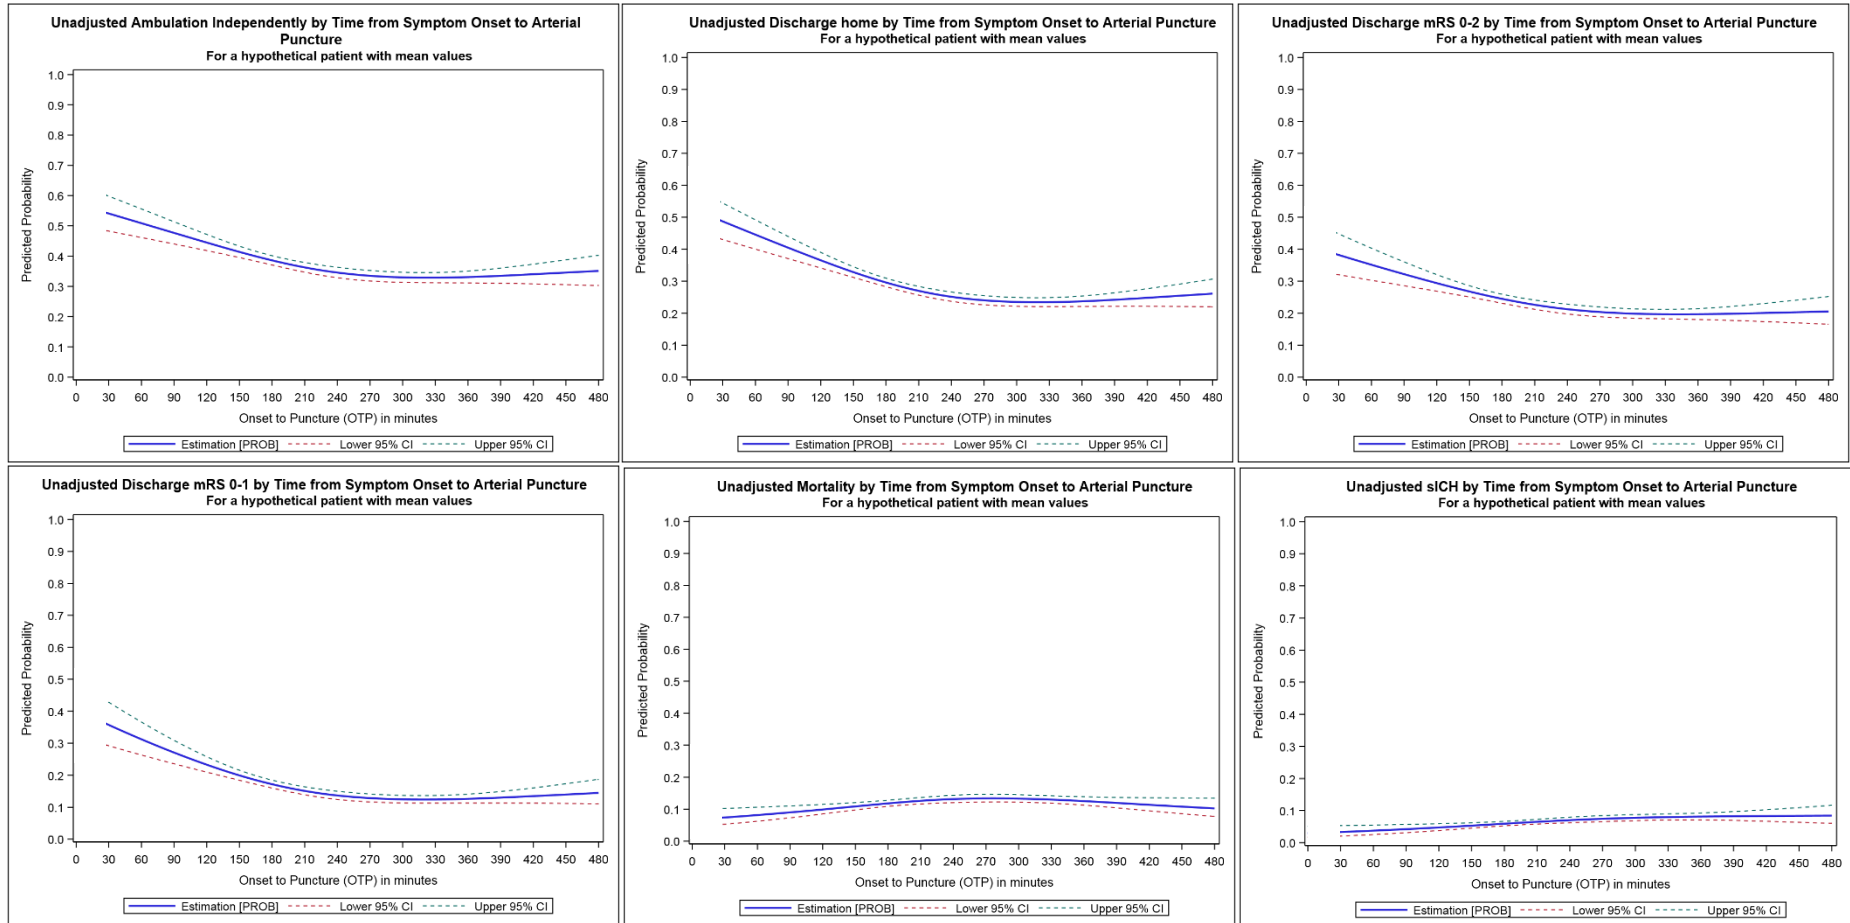

**eFigure 5. Changes in additional clinical and adverse event outcomes with continuous variation in onset-to-puncture time, adjusted analysis. Curves show the adjusted predicted outcome rate for a hypothetical patient with mean values for baseline characteristics, for Onset to Puncture and: Top row: Left) discharge to home or acute rehabilitation facility (IRF, inpatient rehabilitation facility) ; Middle) disability-free (mRS 0-1) at 3 months; Right) functional independence (mRS 0-2) at 3 months; Bottom row: Left) substantial reperfusion (mTICI 2b-3); Right) in-hospital mortality or discharge to hospice.**

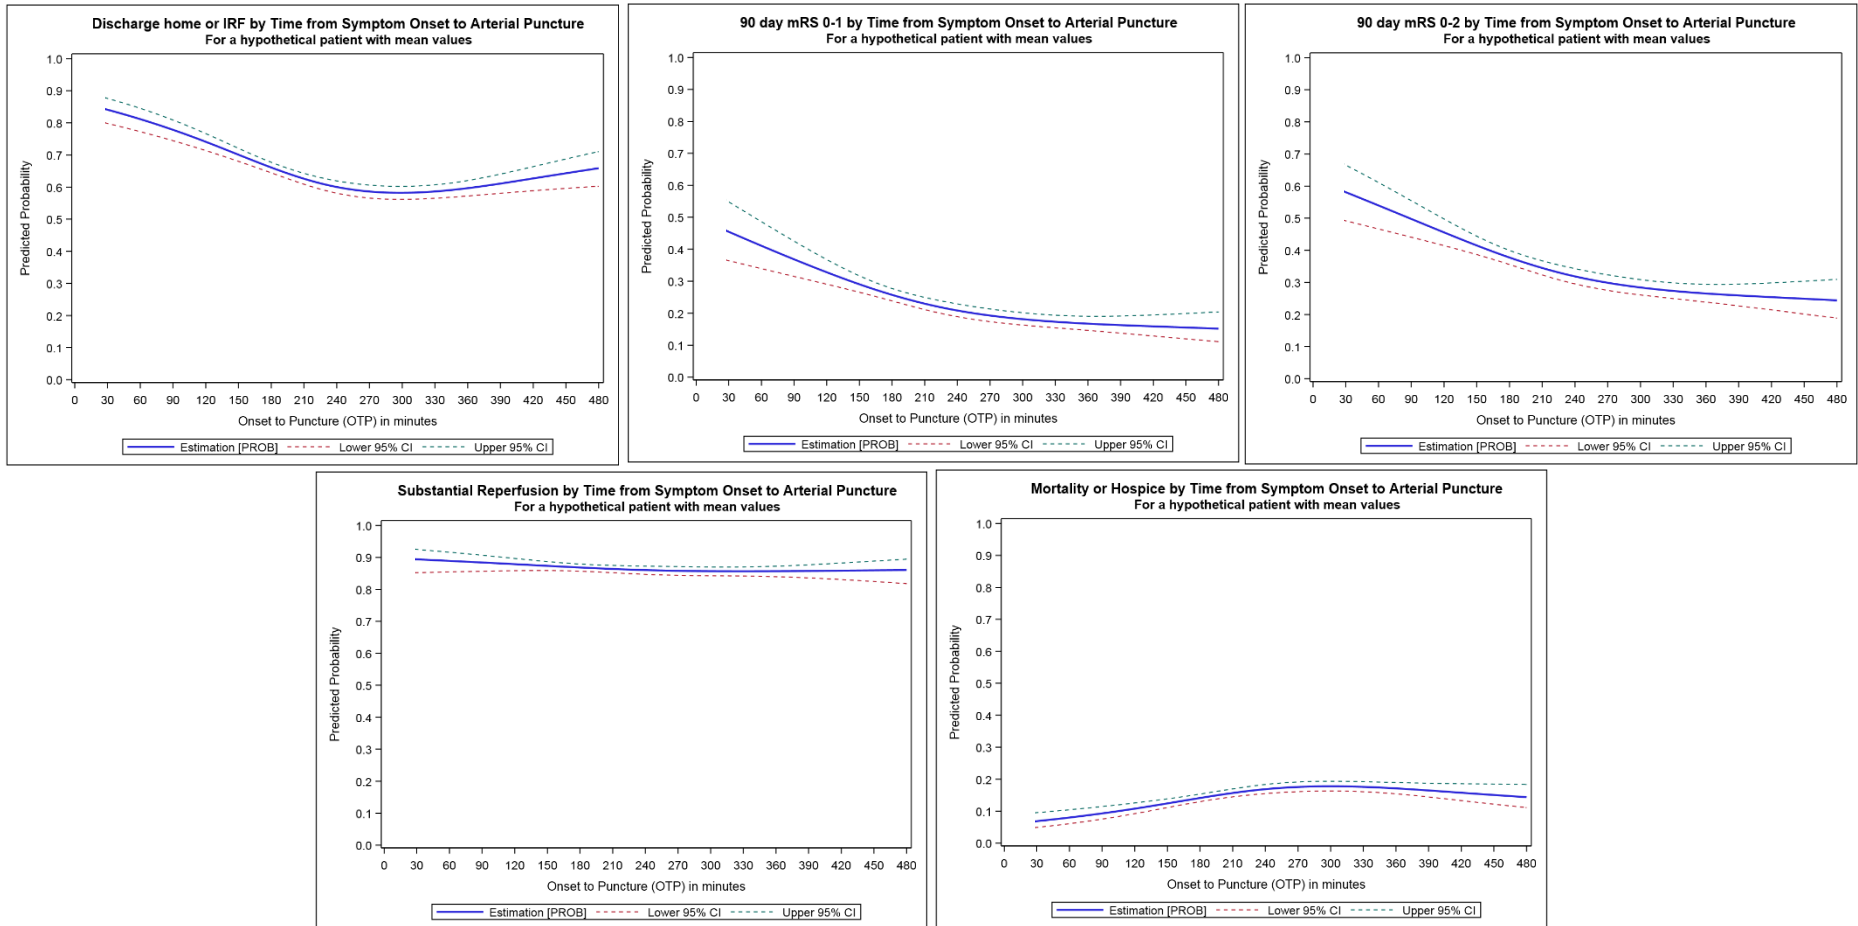

**eFigure 6. Changes in main clinical and adverse event outcomes with continuous variation in onset-to-puncture time, in witnessed and unwitnessed onset patients, adjusted analysis. Relationships between onset to puncture and the binary outcomes were assessed with restricted cubic splines with knots at the 5th, 35th, 65th, 95th percentiles. Curves show the predicted outcome rate for a hypothetical patient with mean values for baseline characteristics, for onset to puncture and: First row: independent ambulation at discharge; Second row: discharge to home; Third row: functional independence (mRS 0-2) at discharge; Fourth row: disability-free (mRS 0-1) at discharge; Fifth row: in-hospital mortality; Sixth row: symptomatic intracranial hemorrhage.**

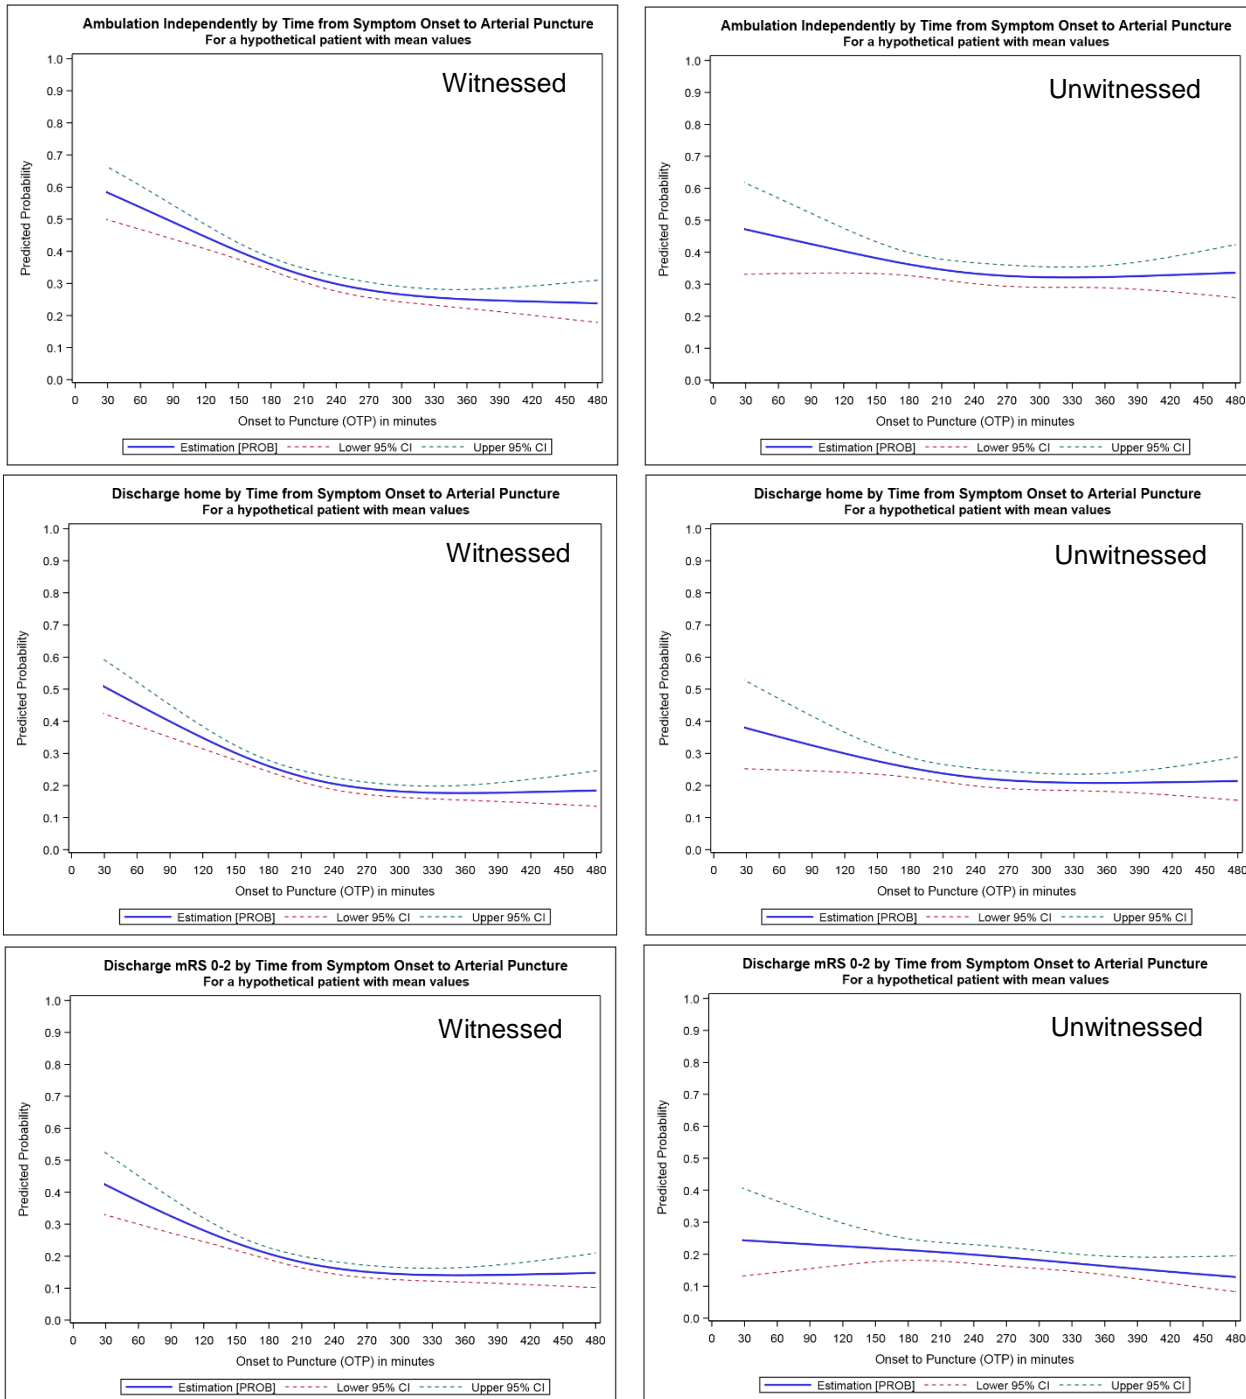

eFigure 6. (continued from previous page)

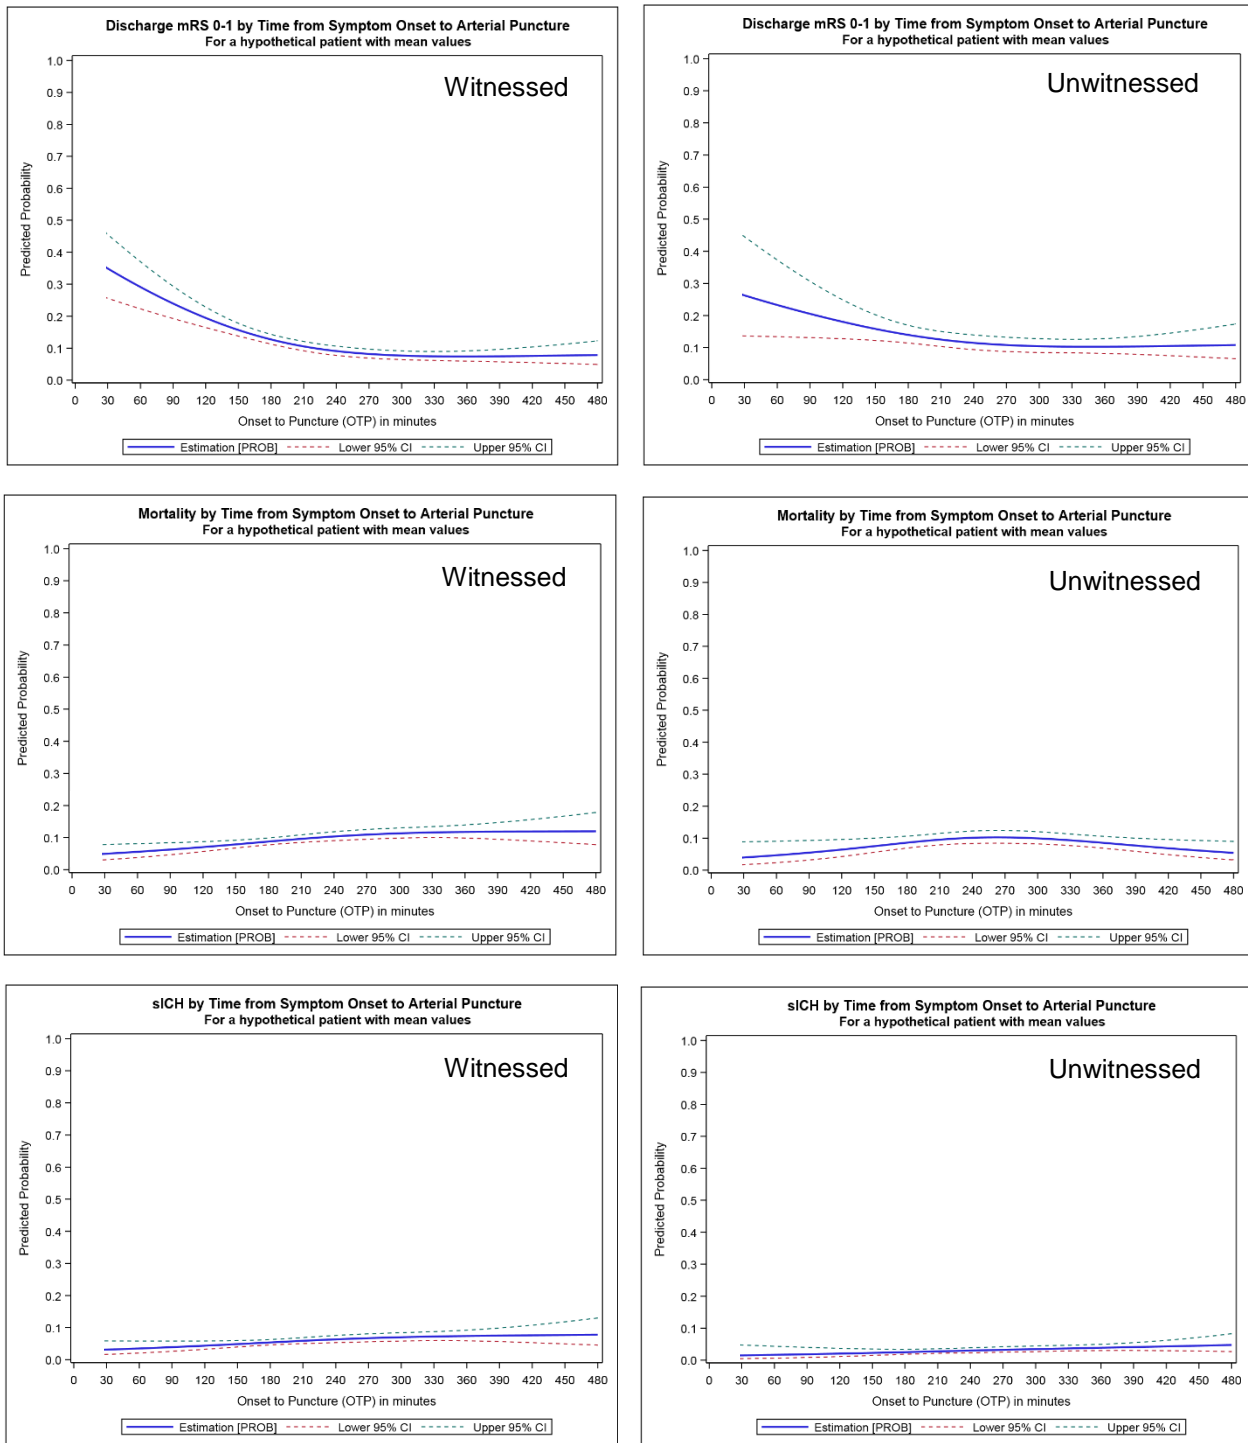

eFigure 7. Changes in clinical and adverse event outcomes with continuous variation in door-to-puncture time, unadjusted analysis. Relationships between onset to puncture and the binary outcomes were assessed using logistic regression models with restricted cubic splines with knots at the 5th, 35th, 65th, 95th percentiles. Curves show the unadjusted predicted outcome rate for onset to puncture and: Top row: Left-independent ambulation at discharge; Middle-discharge to home; Right-functional independence (mRS 0-2) at discharge; Bottom row: Left-disability-free (mRS 0-1) at discharge; Middle-in-hospital mortality; Right-symptomatic intracranial hemorrhage.

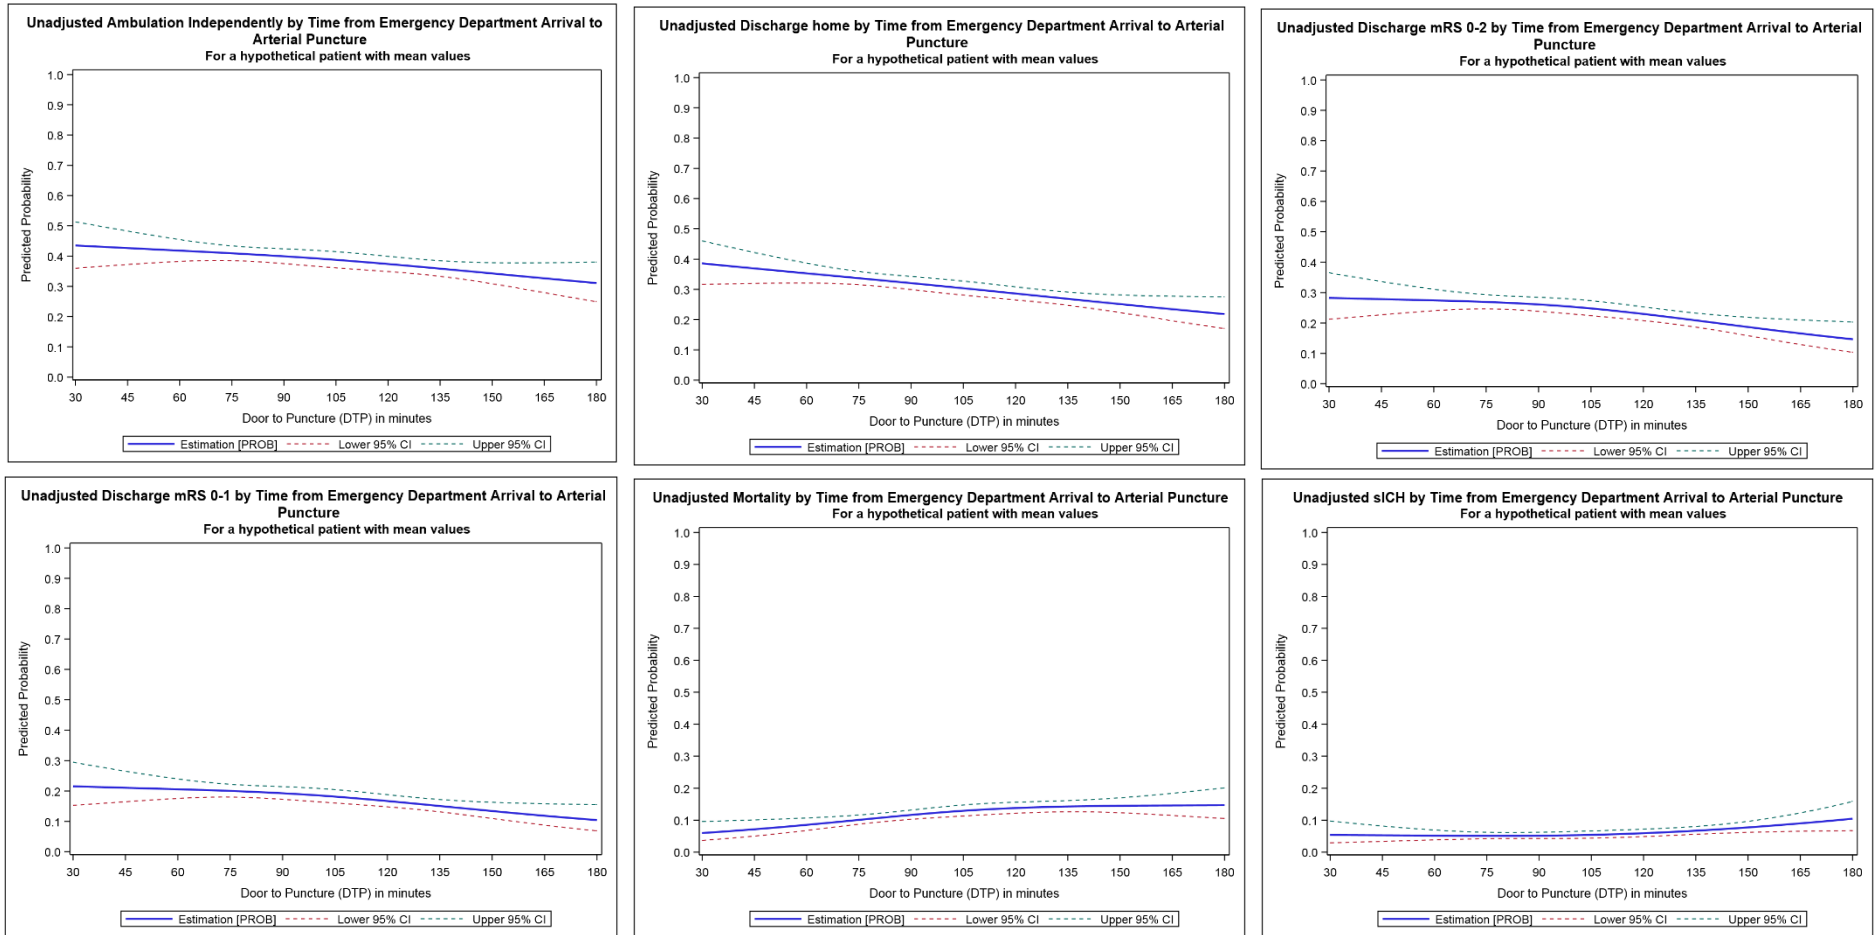

**eFigure 8. Changes in additional clinical and adverse event outcomes with continuous variation in door-to-puncture time, adjusted analysis. Curves show the adjusted predicted outcome rate for a hypothetical patient with median/mode values for baseline characteristics, for door to puncture and: Top row: Left) discharge to home or acute rehabilitation facility (IRF, inpatient rehabilitation facility); Middle) disability-free (mRS 0-1) at 3 months; Right) functional independence (mRS 0-2) at 3 months; Bottom row: Left) substantial reperfusion (mTICI 2b-3); Right) in-hospital mortality or discharge to hospice.**

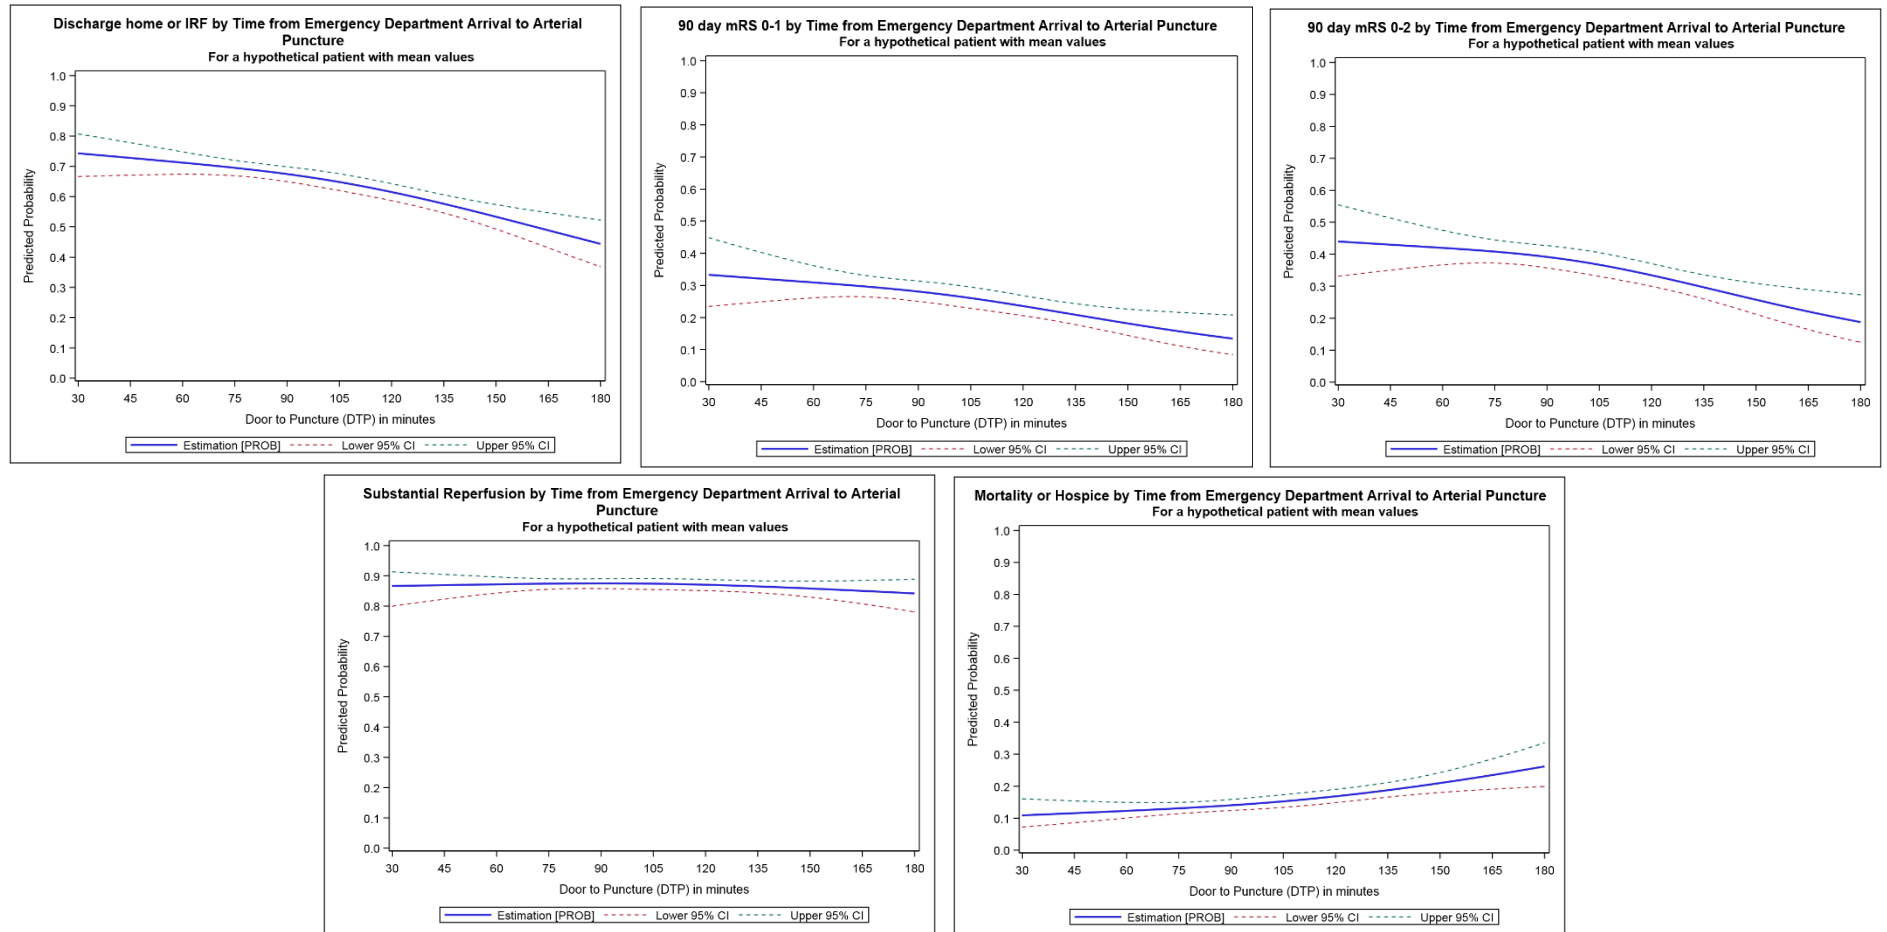

Supplement: jama-322-252-s001.pdf [file jama-322-252-s001.pdf]
